# 1 **Vulnerability and life-history traits correlate with the load of** 2 **deleterious mutations in fish**

## 3 4 *Authors*

5 Jonathan Rolland<sup>1,2\*</sup> & Jonathan Romiguier<sup>3\*</sup>

## 6 7 *Authors' affiliations*

8 <sup>1</sup>*Department of Zoology, University of British Columbia, #4200-6270 University Blvd.,*  
9 *Vancouver, B.C., Canada*

10 <sup>2</sup>*Department of Computational Biology, University of Lausanne, Quartier Sorge, 1015*  
11 *Lausanne, Switzerland*

12 <sup>3</sup>*CNRS, UMR 5554 Institut des Sciences de l'Evolution (Université de Montpellier), Place*  
13 *Eugène Bataillon, 34095 Montpellier, France*

## 14 15 *Authors for correspondence (\*):*

16 Jonathan Rolland: [jonathan.rolland@yahoo.fr](mailto:jonathan.rolland@yahoo.fr)

17 Jonathan Romiguier: [jonathan.romiguier@umontpellier.fr](mailto:jonathan.romiguier@umontpellier.fr)

18  
19 **Keywords:** mutational meltdown, dN/dS ratio, extinction, effective population size.

## 20 21 **Abstract**

22 Understanding why some species accumulate more deleterious substitutions than others is an  
23 important question relevant in evolutionary biology and conservation sciences. Previous  
24 studies conducted in terrestrial taxa suggest that life history traits correlate with the efficiency  
25 of purifying selection and accumulation of deleterious mutations. Using a large genome  
26 dataset of 76 species of fishes, we show that the rate of deleterious mutation accumulation  
27 (measured via dN/dS, *i.e.* non-synonymous over synonymous substitution rate) is associated  
28 to the vulnerability, the life-history strategies, and the latitude of species. Our results,  
29 focusing on a large clade of aquatic species, generalizes previous patterns found so far in few  
30 clades of terrestrial vertebrates. These results also suggest that vulnerable species accumulate  
31 more deleterious substitutions than non-threatened ones, which give insights in how life-  
32 history traits, populations sizes and genetic risk of extinction can be tightly interconnected.

33

## 34 **Main text**

### 35 **Introduction**

36 Determining the factors explaining why some species are more vulnerable than others is  
37 urgent given the acceleration of species extinction rates in the last decades (Barnosky et al.  
38 2011). While it is accepted that a combination of demographic, ecological (Jennings 1998;  
39 Reynolds 2001) and genetic factors (Spielman et al. 2004) contribute to species extinction,  
40 their relative importance is still unclear.

41 Based on metrics such as geographical range or population size, the widely used red  
42 list IUCN index relies nearly exclusively on demographic and population dynamics criteria  
43 (Strona et al. 2014). Such an approach reliably measures the conservation status of a species  
44 under ongoing threats, but is not designed to assess the intrinsic vulnerability of a species to  
45 potential future threats (Miranda et al. 2017). To fill this gap and better manage the increasing  
46 problem of overfishing, an alternative vulnerability index has been developed for fish species:  
47 the *Fishbase* vulnerability index (Cheung et al. 2005). Instead of relying on demographic  
48 criteria, this index exploits the well-known fact that population size and population growth  
49 depends on life history and ecological species features, such as body length, longevity,  
50 fecundity or sexual maturity; as populations of large and long-lived species being smaller and  
51 less resilient than small and short-lived ones (Cheung et al. 2005).

52 Because the effective population size and genome evolution are related, the genomic  
53 sequence of a given species keeps track of the past variations in population size  
54 (Nadachowska-Brzyska et al. 2015). Therefore, long-term population size can be tracked  
55 down by measuring species genetic diversity (Romiguier et al. 2014) or the ratio of non-  
56 synonymous mutations over synonymous mutations ( $dN/dS$ ; Popadin et al. 2007; Nikolaev et  
57 al. 2007; Romiguier et al. 2013; Figuet et al. 2016; Botero-Castro et al. 2017). In this study,  
58 we propose to test whether vulnerable species accumulate more deleterious alleles than non-  
59 threatened ones. We choose to focus our study on teleostean fishes, a large taxa with various  
60 life-history traits, for which i) several genomes have been recently sequenced (Malmstrøm et  
61 al. 2017) and ii) unmatched resources in terms of vulnerability index are available due to their  
62 economic importance for fishing activities. Furthermore, studies trying to link effective  
63 population size, life history traits and genome evolution focused so far exclusively on  
64 terrestrial species (mammals: Nikolaev et al. 2007; Popadin 2007; Romiguier et al. 2012,  
65 2013; birds: Botero-Castro et al. 2017; reptiles: Figuet et al. 2016). These studies concluded  
66 that species with a “K-strategy” (i.e. large body size, long-lived and low fecundity) are more

67 likely to exhibit small effective population sizes on the long-term (MacArthur & Wilson  
68 1967). By comparing the life history traits and species vulnerability to the genome-wide  
69 efficiency of purifying selection in 76 teleostean species, we test here whether commonly  
70 assumed patterns in terrestrial habitats can be generalized to aquatic environments.

71

## 72 **Results and Discussion**

73 For several decades, studies in conservation sciences have aimed to identify the causes  
74 of species vulnerability to extinction. Large body size, low fecundity and low rate of niche  
75 evolution have already been identified in previous studies as correlates of high extinction risk  
76 in mammals or birds (Fritz et al. 2009; Lavergne et al. 2013). Based on a dataset of 76 species  
77 of fish, our genomic analyses showed that the rate of non-synonymous over synonymous  
78 substitutions (dN/dS) was strongly associated to vulnerability ( $P = 1.68 \times 10^{-5}$ ,  $R^2_{\text{adjust}} = 0.24$ ,  
79 Figure 1, Table 1). This association was found when dN/dS was estimated with *mapnh* and  
80 *PAML* and when we controlled for phylogenetic correlation (Figure 1, Table 1,  
81 Supplementary Material S2). We also found a strong relationship between dN/dS and life  
82 history traits (dN/dS and body length:  $P = 1.65 \times 10^{-5}$ ,  $R^2_{\text{adjust}} = 0.25$ ; dN/dS and longevity:  $P =$   
83  $3.69 \times 10^{-2}$ ,  $R^2_{\text{adjust}} = 0.11$ ; Table 1), which is consistent with previous studies on terrestrial clades  
84 in mammals, birds and metazoa (Nikolaev et al. 2007; Popadin 2007; Romiguier et al. 2012,  
85 2013, 2014; Botero-Castro et al. 2017; Figuet et al. 2016). Our analyses indicate that these  
86 results are not due to substitution saturation that could bias dN/dS estimations (Supplementary  
87 Material S3). Additional test showed that the relationship between dN/dS and vulnerability  
88 remained significant even when we removed the 15% of the longest branches that are  
89 potentially more affected by saturation ( $P < 0.05$ , Supplementary Material S4).

90 One potential interpretation of the strong relationship found between vulnerability and dN/dS  
91 is that the accumulation of deleterious mutation is playing a role in the extinction of species.  
92 Indeed, the decrease of the efficiency of purifying selection in populations with small  
93 effective sizes (Ohta et al. 1992) has been linked to a snow-ball mechanism for species  
94 extinction known as mutational meltdown (Lynch et al. 1995). The accumulation of  
95 deleterious mutations can lead, in the long term, to a decrease of fitness resulting in a decrease  
96 of population size which ultimately will also increase the accumulation of deleterious alleles,  
97 leading to a further decrease of population size. Such negative demographic/genetic feedbacks  
98 loops toward extinction have already been proposed as a potential explanation for the local  
99 extirpation of large vertebrates (e.g. woolly mammoth, Rogers et al. 2017). In the present

100 study, it is however difficult to disentangle causation from correlation. Indeed, the *Fishbase*  
101 vulnerability index is directly built from life-history traits, which is reflected in our data by  
102 the strong correlation between vulnerability and body size ( $R^2_{\text{ajust}} = 0.60$ ,  $P = 3.29 \times 10^{-14}$ ). Given  
103 the fact that dN/dS correlates equally with vulnerability and other life-history traits, it is  
104 difficult to conclude that genetic factors (dN/dS) are directly causing species extinction. A  
105 more parsimonious explanation is that life-history traits (e.g. body size), vulnerability and  
106 dN/dS are all correlated simply because they are all different proxies of effective population  
107 size (Jennings and Blanchard 2004). Because they all correlate with each other, it is  
108 consequently difficult to disentangle demographic, ecological and genetic components of  
109 extinction risks, even if low population sizes, large body sizes and high rates of deleterious  
110 mutations seems to be all directly or indirectly associated to high species vulnerability. Future  
111 studies using a different metric of species vulnerability calculated independently from life  
112 history traits might help to better measure the relative contribution of ecological and genetic  
113 factor on fish extinction risk (Polishchuk et al. 2015).

114 Our estimate of dN/dS was also significantly higher in species distributed at higher  
115 latitude ( $P = 2.17 \times 10^{-3}$ ,  $R^2_{\text{ajust}} = 0.13$ , Table 1), although this relationship was not significant for  
116 the *PAML* analysis (Supplementary material S2). This result suggests that species distributed  
117 at high latitude may have generally lower or less stable population sizes. We found a  
118 significant relationship between latitude and vulnerability (PGLS,  $P = 5.32 \times 10^{-3}$ ,  $R^2_{\text{ajust}} = 0.10$ ,  
119 Supplementary material S1) but, surprisingly, latitude was not associated with either body  
120 size (PGLS,  $P > 0.05$ ,  $R^2_{\text{ajust}} = 0.03$ ) or longevity ( $P > 0.05$ ,  $R^2_{\text{ajust}} = -0.01$ ). We thus hypothesize  
121 that latitude may be associated to population size by other mechanisms than an increase of  
122 body size and longevity. For example, population dynamics at high latitude might be related  
123 to other ecological factors, such as strong seasonal and long-term climatic oscillations which  
124 reduce periodically the carrying capacity of high latitude ecosystems (Dynesius and Jansson  
125 2000). This result also implies that particular attention should be paid to vulnerable species at  
126 high latitude, given that they might have lower long-term effective population sizes, which  
127 would lead to accumulate more deleterious mutations, compared to tropical species.

128 The strong correlations found between vulnerability and dN/dS and between body size  
129 and dN/dS suggest that vulnerability and body size might be generally better proxies of  
130 effective population size than latitude or longevity. In theory, longevity should be also related  
131 to population size and dN/dS (Romiguier et al. 2013), but in practice the difficulty to measure  
132 longevity in the wild may lead to spurious life span measures that may blur the relationship  
133 with dN/dS. Similarly, latitude might be related to population size but species distribution is

134 also depending on other factors such as dispersal contingencies and species interactions  
135 (Sexton et al. 2009), which are not expected to be directly related to the effective population  
136 size.

137

## 138 **Conclusion**

139 Based on genomes of 76 species of fishes, our study shows that large, long-lived and  
140 vulnerable species accumulate more deleterious mutations than small, short-lived and not  
141 vulnerable species. Our results extend to aquatic environments the association between the  
142 efficiency of natural selection and species life-history strategies previously found in few  
143 clades of terrestrial vertebrates. Finally, this work also highlights for the first time a positive  
144 relationship between dN/dS and latitude, suggesting that species distributed at higher latitude  
145 might have small long-term effective population sizes, and consequently accumulates more  
146 deleterious mutations than tropical species.

147

## 148 **Material & Methods**

149

### 150 *Molecular data and phylogeny*

151 We used the alignments and the phylogenetic tree provided by the authors of Malmstrøm et  
152 al. (2017). The authors aligned 1938 exons, from 120 to 1764 bp (Supplementary Material  
153 S7), in 76 fish species using a multi-step blast procedure with 33,737 annotated zebrafish  
154 genes (from the Ensembl release 78; Cunningham et al. 2014). All alignments provided by  
155 Malmstrøm et al. are available in the zenodo dataset repository  
156 (<https://zenodo.org/record/3516455#.XbjIMad7R3m>) and correspond to the less strictly  
157 filtered dataset before removal of 3<sup>rd</sup> codon position. The phylogenetic tree was constructed  
158 with RAxML v. 8.1.17 (Stamatakis 2014) and BEAST v.2.2 (Bouckaert 2014) using 567  
159 exons from 111 genes, with a total alignment length of 71,418 bp and 17 fossil calibrations  
160 (see Malmstrøm et al. 2017 for more details).

161

### 162 *Data*

163 Body length, latitude and vulnerability data were obtained for all 76 species in *Fishbase*  
164 (<http://www.fishbase.org/>, Froese & Pauly 2014). Longevity was obtained for 33 species. The  
165 *Fishbase* vulnerability index is calculated from a method averaging several traits related to  
166 the rate of reproduction, such as body size and generation time (Cheung et al. 2005).

167

168 *Molecular evolution and dN/dS*

169 We estimated the number of synonymous and non-synonymous substitutions in the terminal  
170 branches of the 76 teleost species from the alignment of 1938 concatenated genes (378,663 bp  
171 for the concatenated alignment) using the probabilistic substitution mapping implemented in  
172 the software *mapnh* (Romiguier et al. 2012; <https://github.com/BioPP/testnh>). The *mapnh*  
173 analysis estimates a probabilistic count of synonymous and non-synonymous substitutions.  
174 We used the ratio of the sum of non-synonymous substitutions and the sum of synonymous  
175 substitutions as our dN/dS measure. For the *PAML* analysis, we first estimated dN and dS on  
176 each individual genes (see Supplementary Material S7 for the details), and then computed the  
177 average dN and average dS by weighting with gene length.

178 Estimates of dN/dS can be poorly estimated when the total number of substitutions is  
179 small (short branches). We controlled for this bias by running all analyses after the removal of  
180 the terminal branches with less than 10,000 synonymous substitutions (~15% smallest  
181 branches). We chose this threshold because it allowed to eliminate atypical short branches,  
182 which were difficult to compare with the others branches for accurate dN/dS estimations.  
183 These small branches belonged mostly to closely related species inside taxa that were over-  
184 sampled compared to the other clades, such as the *Gadinae* subfamily. We replicated the  
185 analysis with the dN/dS estimations produced by *codeml* from the *PAML* package (Yang  
186 2007).

187

188 *Relationship between dN/dS, life history traits and vulnerability.*

189 We tested whether dN/dS was associated with life history traits and vulnerability with  
190 phylogenetic generalized least squares regressions (*pgls* function of the *R* package *caper*). The  
191 *pgls* function allows to model a linear relationship while taking into account the phylogenetic  
192 structure of correlation between variables. For plotting the phylogenetic generalized least  
193 squares regressions, we transformed the x and y-axis in order to take into account the  
194 phylogenetic correlation in variables (code provided in Supplementary Material S6, Figure1).  
195 We then tested the robustness of the association between dN/dS and life history  
196 traits/vulnerability with two other set of analyses: one set of analyses with all species  
197 (including branches with less than 10,000 synonymous substitutions, Supplementary Material  
198 S5), and one set of analyses removing the ~15% longest branches (branches with more than  
199 35,000 synonymous substitution) to test whether substitution saturation was affecting our

200 results (Supplementary Material S4). We also tested whether substitution saturation affected  
201 our results with the entropy index of substitution of Xia et al. 2003 in the software *DAMBE 7*  
202 following the procedure described in Xia & Lemey (2009; see Supplementary Material S3 for  
203 more details).

204

205

## 206 **Acknowledgments**

207 We thank Xuhua Xia, Matthew Hahn for advices on the analyses. We also thank Dolph  
208 Schluter for providing the code to plot the phylogenetic generalized least squares regressions.  
209 JR received funding from the European Union's Horizon 2020 research and innovation  
210 programme under the Marie Skłodowska-Curie grant agreement No. 785910 and the Banting  
211 postdoctoral fellowship (151042)

212

## 213 **Authors contributions**

214 J.R. and J.R. designed the study, ran the analyses and wrote the manuscript.

215

## 216 **References**

217

218 Barnosky AD, Matzke N, Tomiya S, Wogan, GO, Swartz, B, Quental, TB *et al.* 2011. Has the  
219 Earth's sixth mass extinction already arrived? *Nature* 471:51.

220

221 Botero-Castro F, Figuet E, Tilak MK, Nabholz B, Galtier N. 2017. Avian genomes revisited:  
222 hidden genes uncovered and the rates versus traits paradox in birds. *Mol Biol Evol* 34:3123-  
223 3131.

224

225 Bouckaert R, Heled J, Kühnert D, Vaughan T, Wu CH, Xie D, Suchard MA, Rambaut A,  
226 Drummond AJ. 2014. BEAST 2: a software platform for Bayesian evolutionary analysis.  
227 *PLoS comput biol*, 10:p.e1003537.

228

229 Cheung WW, Pitcher TJ, Pauly D. 2005. A fuzzy logic expert system to estimate intrinsic  
230 extinction vulnerabilities of marine fishes to fishing. *Biol Cons.* 124:97-111.

231



232 Cunningham F, Amode MR, Barrell D, Beal K, Billis K, Brent S, Carvalho-Silva D, Clapham  
233 P, Coates G, Fitzgerald S, Gil L. 2014. Ensembl 2015. *Nucleic Acids Res*, 43:D662-D669.

234  
235 Dynesius M, Jansson R. 2000. Evolutionary consequences of changes in species' geographical  
236 distributions driven by Milankovitch climate oscillations. *Proc Natl Acad Sc USA*. 97:9115-  
237 9120.

238  
239 Figuet E, Nabholz B, Bonneau M, Mas Carrio E, Nadachowska-Brzyska K, Ellegren H,  
240 Galtier N. 2016. Life history traits, protein evolution, and the nearly neutral theory in  
241 amniotes. *Mol Biol Evol*. 33:1517-1527.

242  
243 Froese R, Pauly D. 2018. *FishBase*. <https://www.fishbase.org/>. World Wide Web Electron.  
244 Publ. version. (04/2018).

245  
246 Fritz SA, Bininda-Emonds OR, Purvis A. 2009. Geographical variation in predictors of  
247 mammalian extinction risk: big is bad, but only in the tropics. *Ecol. Lett*. 12:538-549.

248  
249 Jennings S, Reynolds JD, Mills SC. 1998. Life history correlates of responses to fisheries  
250 exploitation. *Proc R Soc Lond*. 265:333-339.

251  
252 Jennings S, Blanchard JL. 2004. Fish abundance with no fishing: predictions based on  
253 macroecological theory. *J Anim Ecol*. 73:632-642.

254  
255 Lavergne S, Evans ME, Burfield IJ, Jiguet F, Thuiller W. 2013. Are species' responses to  
256 global change predicted by past niche evolution? *Phil Trans Roy Soc B-Biol Sci*.  
257 368:20120091.

258  
259 Lynch M, Conery J, Burger R. 1995. Mutation accumulation and the extinction of small  
260 populations. *Am Nat*. 146:489-518.

261  
262 MacArthur, R. and Wilson, E. O. 1967. *The Theory of Island Biogeography*. Princeton  
263 University Press.

264



- 265 Malmstrøm M, Matschiner M, Tørresen OK, Jakobsen KS, Jentoft S. 2017. Whole genome  
266 sequencing data and *de novo* draft assemblies for 66 teleost species. *Sci Data*. 4, 160132.  
267
- 268 Mace GM, Redford KH, Robinson JG. 2001. *Conservation of Exploited Species*. Cambridge  
269 University Press, Cambridge, pp. 147–169.  
270
- 271 Michael L, Conery J, & Burger R. 1995. Mutation accumulation and the extinction of small  
272 populations. *Am Nat*. 146, 489–518.  
273
- 274 Miranda R. 2017. The misguided comparison of vulnerability and conservation status. *Aquat*  
275 *Conserv: Mar Freshw Ecosyst*. 27:898-899.  
276
- 277 Nadachowska-Brzyska K, Li C, Smeds L, Zhang G, Ellegren H. 2015. Temporal dynamics of  
278 avian populations during Pleistocene revealed by whole-genome sequences. *Curr*  
279 *Biol*. 25:1375-1380.  
280
- 281 Nikolaev SI, Montoya-Burgos JI, Popadin K, Parand L, Margulies EH. 2007. Life-history  
282 traits drive the evolutionary rates of mammalian coding and noncoding genomic elements.  
283 *Proc Natl Acad Sc USA*. 104:20443-20448.  
284
- 285 Ohta T. 1992. The nearly neutral theory of molecular evolution. *Annu Rev Ecol Evol Syst*.  
286 23:263-286.  
287
- 288 Pinsky ML, Jensen OP, Ricard D, Palumbi SR. 2011. Unexpected patterns of fisheries  
289 collapse in the world's oceans. *Proc Natl Acad Sc USA*. 108:8317-8322.  
290
- 291 Popadin K, Polishchuk LV, Mamirova L, Knorre D, Gunbin K. 2007. Accumulation of  
292 slightly deleterious mutations in mitochondrial protein-coding genes of large versus small  
293 mammals. *Proc Natl Acad Sc USA*. 104:13390-13395.  
294
- 295 Reynolds JD, Jennings S, Dulvy NK. 2001. *Life histories of fishes and population responses*  
296 *to exploitation*. Conservation biology series - Cambridge.  
297

- 298 Rogers RL, Slatkin M. 2017. Excess of genomic defects in a woolly mammoth on wrangel  
299 Island. *PLOS Genet.* 13:e1006601.  
300
- 301 Romiguier J, Figuet E, Galtier N, Douzery EJP, Boussau B, Dutheil JY, Ranwez V. 2012.  
302 Fast and robust characterization of time-heterogeneous sequence evolutionary processes using  
303 substitution mapping. *PLoS One* 7:e33852.  
304
- 305 Romiguier J, Ranwez V, Douzery EJP, Galtier N. 2013. Genomic evidence for large, long-  
306 lived ancestors to placental mammals. *Mol Biol Evol.* 30:5-13.  
307
- 308 Romiguier J, Gayral P, Ballenghien M, Bernard A, Cahais V, Chenuil A, Chiari Y, Dernat R,  
309 Duret L, Faivre N, Loire E. 2014. Comparative population genomics in animals uncovers the  
310 determinants of genetic diversity. *Nature.* 515:261.  
311
- 312 Sexton JP, McIntyre PJ, Angert AL, Rice KJ. 2009. Evolution and ecology of species range  
313 limits. *Annu. Rev. Ecol. Evol. Syst.* 40, 415-436.  
314
- 315 Spielman D, Brook BW, Frankham R. 2004. Most species are not driven to extinction before  
316 genetic factors impact them. *Proc Natl Acad Sc USA.* 101:15261-15264.  
317
- 318 Stamatakis, A. 2014. RAxML version 8: a tool for phylogenetic analysis and post-analysis of  
319 large phylogenies. *Bioinformatics* 30.9: 1312-1313.  
320
- 321 Strona G. 2014. Assessing fish vulnerability: IUCN vs FishBase. *Aquat Conserv: Mar Freshw*  
322 *Ecosyst.* 24:153-154.  
323
- 324 Xia X, Xie Z, Salemi M, Chen L, & Wang Y. 2003. An index of substitution saturation and its  
325 application. *Mol Phyl Evol*, 26: 1-7.  
326
- 327 Xia X., Lemey P. 2009. Assessing substitution saturation with DAMBE. *The phylogenetic*  
328 *handbook: a practical approach to DNA and protein phylogeny*, 2, 615-630.  
329

330 Yang Z. 2007. PAML 4: phylogenetic analysis by maximum likelihood. *Mol Biol Evol.*  
331 24:1586-1591.

332

333

334

335

336

## 337 **Tables et Figures**

338

339 **Table 1. Phylogenetic generalized least squares regressions between dN/dS,**  
340 **vulnerability, latitude, body length and longevity.** Our analyses were ran with the *pgls*  
341 function which allows us to model the relationship between variables accounting for  
342 phylogenetical non-independence. dN/dS was computed using *mapnh*.

343

| Variable         | Intercept (Std. Error)                          | Estimate (Std. Error)                           | t value | P-value               | $R^2_{\text{ajust}}$ |
|------------------|-------------------------------------------------|-------------------------------------------------|---------|-----------------------|----------------------|
| Vulnerability    | $5.74 \times 10^{-2}$ ( $9.27 \times 10^{-3}$ ) | $3.72 \times 10^{-4}$ ( $7.99 \times 10^{-5}$ ) | 4.66    | $1.68 \times 10^{-5}$ | 0.24                 |
| Latitude         | $5.27 \times 10^{-2}$ ( $1.04 \times 10^{-2}$ ) | $4.21 \times 10^{-4}$ ( $1.32 \times 10^{-4}$ ) | 3.2     | $2.17 \times 10^{-3}$ | 0.13                 |
| log(Body length) | $4.51 \times 10^{-2}$ ( $1.04 \times 10^{-2}$ ) | $7.56 \times 10^{-3}$ ( $1.62 \times 10^{-3}$ ) | 4.67    | $1.65 \times 10^{-5}$ | 0.25                 |
| log(Longevity)   | $6.01 \times 10^{-2}$ ( $1.20 \times 10^{-2}$ ) | $6.02 \times 10^{-3}$ ( $2.75 \times 10^{-3}$ ) | 2.19    | $3.69 \times 10^{-2}$ | 0.11                 |

344

345

346

347

348

349

350

351

352

353

354

355 **Figure 1. dN/dS is associated with vulnerability.** dN/dS was computed using either (A)  
356 *mapnh* or (B) *PAML*. Regression line, P-values and  $R^2_{\text{adjust}}$  of the phylogenetically generalized  
357 least squares regressions were shown on each panel respectively for all terminal branches of  
358 more than 10,000 synonymous substitutions. The shaded grey represents the 95% confidence  
359 intervals. x and y axes have been transformed in order to account for the phylogenetic  
360 relatedness between variables (script available in Supplementary material S6).  
361

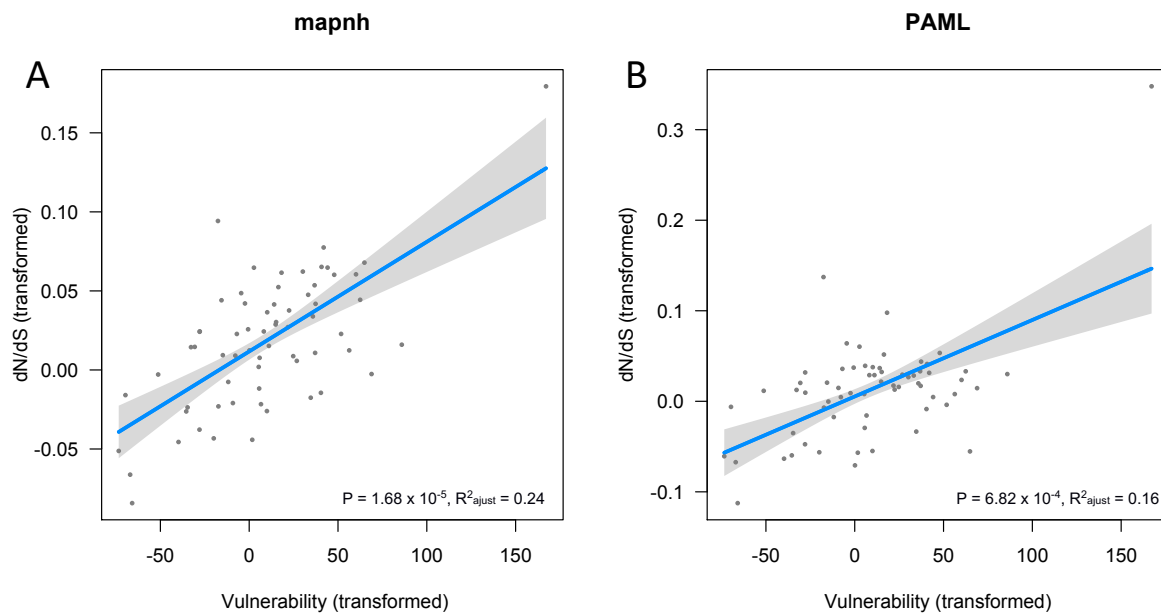

362

363

# 1 Vulnerability and life-history traits correlate with the load of 2 deleterious mutations in fish - Supplementary Material

3

4 **Supplementary Material S1. Relationship between vulnerability and (A) body length,**  
5 **(B) latitude and (C) longevity.** Regression line,  $P$ -value and  $R^2_{\text{ajust}}$  of the phylogenetic least  
6 squared regressions are shown for each variable. The shaded grey represents the 95%  
7 confidence intervals. Body length and longevity have been log-transformed, and latitude is  
8 shown in absolute values. These results were expected given that *Fishbase* vulnerability index  
9 is a metric directly computed from multiple life history traits (Cheung et al. 2005).  $x$  and  $y$   
10 axes have been transformed in order to account for the phylogenetic relatedness between  
11 variables (script available in Supplementary material S6).

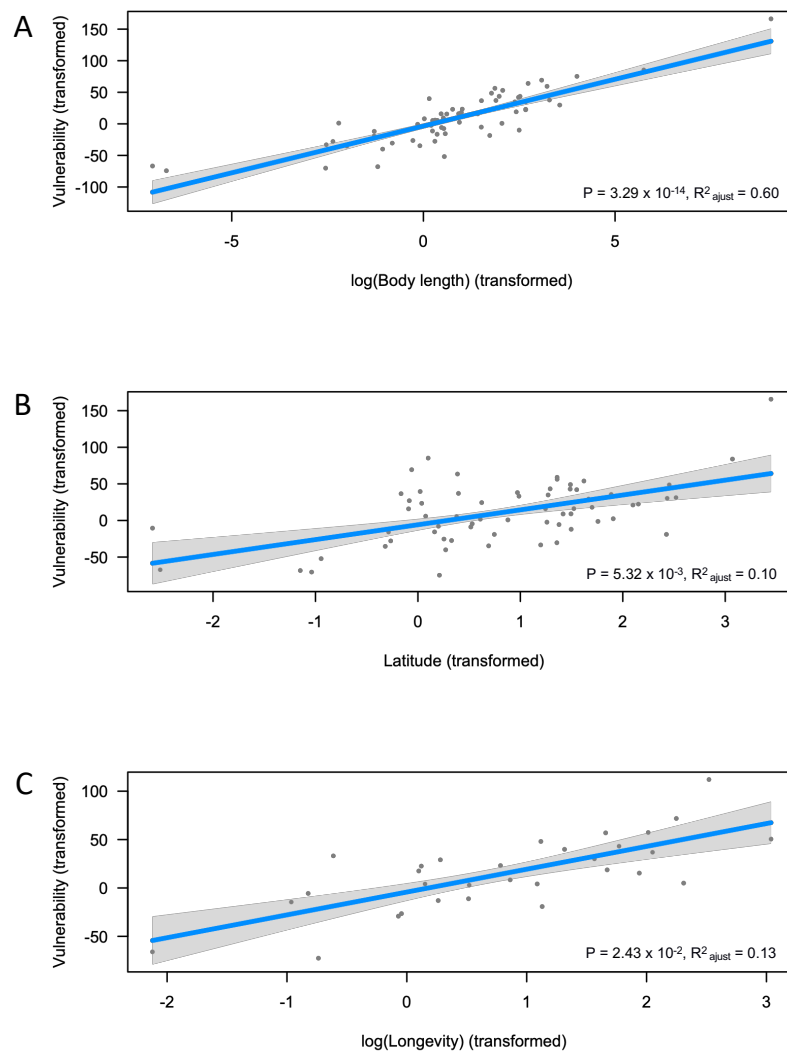

12

13

14

15

**16Supplementary Material S2. Phylogenetic generalized least squares regressions between**  
**17dN/dS, vulnerability, latitude, body length and longevity.** Our analyses were ran with the  
18*pgls* function which allows us to model the relationship between variables accounting for  
19phylogenetical non-independence. dN/dS was computed using *PAML*. We show here that our  
20results are consistent with the results obtained with *mapnh* for vulnerability and body length.

21

| Variable         | Intercept (Std. Error)                          | Estimate (Std. Error)                           | t value | P-value               | $R^2_{\text{adjust}}$  |
|------------------|-------------------------------------------------|-------------------------------------------------|---------|-----------------------|------------------------|
| Vulnerability    | $2.15 \times 10^{-2}$ ( $1.53 \times 10^{-2}$ ) | $4.73 \times 10^{-4}$ ( $1.32 \times 10^{-4}$ ) | 3.57    | $6.82 \times 10^{-4}$ | 0.16                   |
| Latitude         | $3.39 \times 10^{-2}$ ( $1.75 \times 10^{-2}$ ) | $1.52 \times 10^{-4}$ ( $2.22 \times 10^{-4}$ ) | 0.69    | $4.95 \times 10^{-1}$ | $-8.35 \times 10^{-3}$ |
| log(Body length) | $1.00 \times 10^{-2}$ ( $1.77 \times 10^{-2}$ ) | $8.40 \times 10^{-3}$ ( $2.76 \times 10^{-3}$ ) | 3.05    | $3.31 \times 10^{-3}$ | 0.12                   |
| log(Longevity)   | $3.78 \times 10^{-2}$ ( $2.25 \times 10^{-2}$ ) | $3.22 \times 10^{-4}$ ( $5.17 \times 10^{-3}$ ) | 0.06    | $9.50 \times 10^{-1}$ | $-3.43 \times 10^{-2}$ |

22

23

24

25

26

27

28

29

30

31

32 **Supplementary Material S3. Substitution saturation analyses using the entropy index of**  
33 **substitution of Xia *et al.* 2003 in the software DAMBE 7.** Estimates of the index of  
34 substitution saturation (Iss) were obtained for a proportion of invariant of  $P = 0.166$ .  
35 Substitution saturation is considered negligible only in the cases noted in bold in the table,  
36 that is to say when the Iss is significantly smaller ( $P < 0.05$ ) than the critical Iss value (Iss.c) at  
37 which the sequences will begin to fail to recover the true tree. Iss.cSym corresponds to the  
38 critical Iss value for symmetrical tree while the Iss.cAsym corresponds to critical Iss value for  
39 unrealistic asymmetrical tree. Because the Iss.c is based on simulations limited to 32 species  
40 in DAMBE, we have randomly sampled 200 times subsets of 4, 8, 16 and 32 species and  
41 performed the test for each subset (see NumOTU in the table). Our results suggest that  
42 substitution saturation remains very limited when the tree is symmetrical, but might be  
43 potentially problematic for recovering the true topology when the tree is extremely  
44 asymmetrical. Although our data is very unlikely falling into this category of extreme  
45 asymmetrical topology as it is considered unrealistic (Xia & Lemey 2009), we also tested  
46 whether removing long branches - with potentially more saturation - affect our results in  
47 Supplementary Material S4.

| NumOTU | Iss          | Iss.cSym     | T              | DF            | P             | Iss.cAsym    | T             | DF            | P             |
|--------|--------------|--------------|----------------|---------------|---------------|--------------|---------------|---------------|---------------|
| 4      | <b>0.575</b> | <b>0.862</b> | <b>269.33</b>  | <b>378662</b> | $P < 10^{-4}$ | <b>0.857</b> | <b>265.01</b> | <b>378662</b> | $P < 10^{-4}$ |
| 8      | <b>0.612</b> | <b>0.859</b> | <b>202.812</b> | <b>378662</b> | $P < 10^{-4}$ | <b>0.785</b> | <b>142.26</b> | <b>378662</b> | $P < 10^{-4}$ |
| 16     | <b>0.674</b> | <b>0.848</b> | <b>129.067</b> | <b>378662</b> | $P < 10^{-4}$ | 0.707        | 24.68         | 378662        | 2.236         |
| 32     | <b>0.76</b>  | <b>0.821</b> | <b>41.686</b>  | <b>378662</b> | $P < 10^{-4}$ | 0.607        | 102.78        | 378662        | $P < 10^{-4}$ |

48

49

50

51

52

53

54

55

56

57

58

59

60

61



62 **Supplementary Material S4. Phylogenetic generalized least squares regressions between**  
63 **dN/dS, vulnerability, latitude, body length and longevity obtained when long branches**  
64 **were removed (potentially more affected by substitution saturation). dN/dS were**  
65 **obtained with *mapnh*. We show here that the results presented in the main manuscript still**  
66 **hold when we removed the branches with more than 35,000 synonymous substitutions (~15%**  
67 **longest branches; as in all other analyses, this analysis also excludes branches with less than**  
68 **10,000 synonymous substitutions).**

69

| Variable         | Intercept (Std. Error)                          | Estimate (Std. Error)                            | t value | P-value               | $R^2_{\text{ajust}}$ |
|------------------|-------------------------------------------------|--------------------------------------------------|---------|-----------------------|----------------------|
| Vulnerability    | $6.99 \times 10^{-2}$ ( $8.68 \times 10^{-3}$ ) | $3.13 \times 10^{-4}$ ( $8.26 \times 10^{-5}$ )  | 3.79    | $3.96 \times 10^{-4}$ | 0.20                 |
| Latitude         | $6.72 \times 10^{-2}$ ( $8.87 \times 10^{-3}$ ) | $-4.80 \times 10^{-4}$ ( $1.22 \times 10^{-4}$ ) | 3.92    | $2.66 \times 10^{-4}$ | 0.22                 |
| log(Body length) | $6.00 \times 10^{-2}$ ( $1.08 \times 10^{-2}$ ) | $5.98 \times 10^{-3}$ ( $1.85 \times 10^{-3}$ )  | 3.24    | $2.13 \times 10^{-3}$ | 0.15                 |
| log(Longevity)   | $7.41 \times 10^{-2}$ ( $1.29 \times 10^{-2}$ ) | $5.56 \times 10^{-3}$ ( $2.79 \times 10^{-3}$ )  | 1.99    | $5.77 \times 10^{-2}$ | 0.1                  |

70

71

72

73 **Supplementary Material S5. Phylogenetic generalized least squares regressions between**  
74 **dN/dS, vulnerability, latitude, body length and longevity obtained with all species (also**  
75 **include branches with less than 10,000 synonymous substitutions). dN/dS were obtained**  
76 **with *mapnh*. We show here that the results presented in the main manuscript still hold for**  
77 **vulnerability, body length and longevity.**

78

| Variable         | Intercept (Std. Error)                          | Estimate (Std. Error)                            | t value | P-value               | $R^2_{\text{ajust}}$ |
|------------------|-------------------------------------------------|--------------------------------------------------|---------|-----------------------|----------------------|
| Vulnerability    | $6.31 \times 10^{-2}$ ( $1.47 \times 10^{-2}$ ) | $2.69 \times 10^{-4}$ ( $9.24 \times 10^{-5}$ )  | 2.92    | $4.71 \times 10^{-3}$ | 0.09                 |
| Latitude         | $7.51 \times 10^{-2}$ ( $1.57 \times 10^{-2}$ ) | $-6.81 \times 10^{-5}$ ( $1.32 \times 10^{-4}$ ) | -0.52   | $6.01 \times 10^{-1}$ | -0.01                |
| log(Body length) | $5.69 \times 10^{-2}$ ( $1.68 \times 10^{-2}$ ) | $4.68 \times 10^{-3}$ ( $2.37 \times 10^{-3}$ )  | 1.96    | $5.27 \times 10^{-2}$ | 0.04                 |
| log(Longevity)   | $6.08 \times 10^{-2}$ ( $1.22 \times 10^{-2}$ ) | $5.84 \times 10^{-3}$ ( $2.78 \times 10^{-3}$ )  | 2.1     | $4.36 \times 10^{-2}$ | 0.10                 |

79

80

**81Supplementary Material S6. Script permitting to transform x and y axis for accounting  
82for phylogenetic correlation when plotting a phylogenetic generalized least squares  
83regression.**

```
84
85 library(visreg)
86
87 inv<-function(x){solve(x)}
88
89 generaleastsquares <- function(x, y, v, save = TRUE){
90 # Function to implement general least squares. X, Y and V must be matrices (use "as.matrix" to make them conform). V is
91 the weight matrix. X must have a column of 1's to include an intercept. The most intuitive way to solve the regression
92 equations is to imagine that there is a transformation of the X and Y variables that would fulfill the assumptions of
93 uncorrelated residuals having equal variances (see Draper, N. R., & Smith, H. (1998). Applied regression analysis (Vol.
94 326). John Wiley & Sons. p 108 in the case of weighted least squares for uncorrelated data; p156 for the case with serially
95 correlated data). The transformation (P) is obtained by solving P'P=V as follows:
96     ve <- eigen(v)
97     pv <- ve$eigenvectors %*% sqrt(diag(ve$values)) %*% t(ve$eigenvectors)
98     xnew <- inv(pv) %*% x
99     ynew <- inv(pv) %*% y
100    beta <- inv(t(xnew) %*% xnew) %*% (t(xnew) %*% ynew)
101    mse <- sum( (ynew-xnew%*%beta)^2 ) / ( nrow(xnew)-ncol(xnew) )
102    sbeta <- sqrt( diag(inv(t(xnew) %*% xnew)) * mse )
103    result <- list(beta = as.vector(beta), sbeta = as.vector(sbeta))
104    if(save){
105        result$xnew <- xnew
106        result$ynew <- ynew
107    }
108    result
109 }
110
111 # Load data here
112 y <- dNdS
113 x <- Vulnerability
114
115 x <- cbind(rep(1, length(x)), x)
116 colnames(x) <- c("x1", "x2")
117
118 # Compute the vcv matrix according to the phylogenetic tree and a Brownian motion model
119 v <- vcv(tree, model = "Brownian", corr = TRUE)
120
121 # Run the phylogenetic generalized least squares regressions
122 result <- generaleastsquares(x=x, y=as.matrix(y), v=v, save=TRUE)
123
124 #Organize the new x and y axes
125 X <- as.data.frame(cbind(ynew=result$ynew[,1], result$xnew))
126
127 #Plot the PGLS
128 z <- lm(ynew ~ x1 + x2 - 1, data = X)
129 visreg(z, "x2", main= "mapnh", ylab= "dN/dS transformed to account for the phylogeny", xlab="Vulnerability")
```

**130Supplementary Material S7. Information on the fish genomes.** This table contains the  
131detailed gene length in bp for each gene, the number of synonymous sites and the number of  
132non-synonymous sites (number of synonymous sites + number of non-synonymous sites = gene  
133length).

| Gene Name          | Gene length | Number of synonymous sites | Number of non-synonymous sites |
|--------------------|-------------|----------------------------|--------------------------------|
| ENSDARE00000004235 | 180         | 43.6                       | 136.4                          |
| ENSDARE00000004308 | 177         | 45.3                       | 131.7                          |
| ENSDARE00000004382 | 240         | 66.7                       | 173.3                          |
| ENSDARE00000004480 | 303         | 62.4                       | 240.6                          |
| ENSDARE00000011348 | 147         | 35.1                       | 111.9                          |
| ENSDARE00000013761 | 186         | 45.7                       | 140.3                          |
| ENSDARE00000013815 | 195         | 47.4                       | 147.6                          |
| ENSDARE00000014930 | 162         | 41                         | 121                            |
| ENSDARE00000016462 | 249         | 49.1                       | 199.9                          |
| ENSDARE00000016629 | 159         | 32.4                       | 126.6                          |
| ENSDARE00000017677 | 141         | 30.5                       | 110.5                          |
| ENSDARE00000022514 | 186         | 42.8                       | 143.2                          |
| ENSDARE00000022574 | 174         | 38.1                       | 135.9                          |
| ENSDARE00000025213 | 390         | 85.8                       | 304.2                          |
| ENSDARE00000025928 | 240         | 37.8                       | 202.2                          |
| ENSDARE00000027640 | 183         | 35.8                       | 147.2                          |
| ENSDARE00000027777 | 213         | 38.9                       | 174.1                          |
| ENSDARE00000028455 | 156         | 32.5                       | 123.5                          |
| ENSDARE00000028706 | 186         | 22.3                       | 163.7                          |
| ENSDARE00000030359 | 228         | 35.9                       | 192.1                          |
| ENSDARE00000030430 | 198         | 58.5                       | 139.5                          |
| ENSDARE00000032670 | 219         | 43.5                       | 175.5                          |
| ENSDARE00000033326 | 159         | 31.8                       | 127.2                          |
| ENSDARE00000033633 | 153         | 31                         | 122                            |
| ENSDARE00000034079 | 153         | 43.1                       | 109.9                          |
| ENSDARE00000035008 | 168         | 48.5                       | 119.5                          |
| ENSDARE00000035506 | 192         | 30                         | 162                            |
| ENSDARE00000035819 | 201         | 42.4                       | 158.6                          |
| ENSDARE00000036153 | 168         | 48.7                       | 119.3                          |
| ENSDARE00000037408 | 210         | 30                         | 180                            |
| ENSDARE00000038723 | 165         | 27.5                       | 137.5                          |
| ENSDARE00000040663 | 171         | 40.2                       | 130.8                          |
| ENSDARE00000041603 | 186         | 45.5                       | 140.5                          |

|                    |     |      |       |
|--------------------|-----|------|-------|
| ENSDARE00000043490 | 192 | 37.2 | 154.8 |
| ENSDARE00000044276 | 168 | 37.5 | 130.5 |
| ENSDARE00000044609 | 156 | 23.3 | 132.7 |
| ENSDARE00000048510 | 207 | 56.9 | 150.1 |
| ENSDARE00000048616 | 147 | 37.1 | 109.9 |
| ENSDARE00000048671 | 150 | 24.1 | 125.9 |
| ENSDARE00000048937 | 189 | 27.1 | 161.9 |
| ENSDARE00000049143 | 138 | 31.4 | 106.6 |
| ENSDARE00000049680 | 159 | 34.8 | 124.2 |
| ENSDARE00000049796 | 306 | 54.3 | 251.7 |
| ENSDARE00000051029 | 255 | 58.8 | 196.2 |
| ENSDARE00000052383 | 246 | 30.2 | 215.8 |
| ENSDARE00000053703 | 153 | 27.9 | 125.1 |
| ENSDARE00000058489 | 186 | 31.5 | 154.5 |
| ENSDARE00000058500 | 147 | 43.3 | 103.7 |
| ENSDARE00000058618 | 186 | 24.9 | 161.1 |
| ENSDARE00000061321 | 360 | 71.4 | 288.6 |
| ENSDARE00000061506 | 165 | 40.4 | 124.6 |
| ENSDARE00000062898 | 261 | 72.8 | 188.2 |
| ENSDARE00000063368 | 195 | 40.9 | 154.1 |
| ENSDARE00000064283 | 168 | 30.4 | 137.6 |
| ENSDARE00000065727 | 174 | 50.1 | 123.9 |
| ENSDARE00000067613 | 162 | 41.4 | 120.6 |
| ENSDARE00000067812 | 147 | 26.7 | 120.3 |
| ENSDARE00000068333 | 126 | 37.9 | 88.1  |
| ENSDARE00000069031 | 201 | 51.9 | 149.1 |
| ENSDARE00000070430 | 249 | 49.3 | 199.7 |
| ENSDARE00000070683 | 180 | 41.7 | 138.3 |
| ENSDARE00000070983 | 150 | 29.2 | 120.8 |
| ENSDARE00000072636 | 198 | 45.5 | 152.5 |
| ENSDARE00000072940 | 171 | 44.9 | 126.1 |
| ENSDARE00000073696 | 153 | 29.5 | 123.5 |
| ENSDARE00000074578 | 165 | 41.9 | 123.1 |
| ENSDARE00000076062 | 141 | 38.6 | 102.4 |
| ENSDARE00000077727 | 171 | 29.1 | 141.9 |
| ENSDARE00000077898 | 180 | 43.9 | 136.1 |
| ENSDARE00000078420 | 165 | 29.5 | 135.5 |
| ENSDARE00000078747 | 204 | 33.7 | 170.3 |
| ENSDARE00000080957 | 174 | 41.9 | 132.1 |
| ENSDARE00000081038 | 195 | 50.6 | 144.4 |
| ENSDARE00000081137 | 165 | 37   | 128   |
| ENSDARE00000081243 | 225 | 32.9 | 192.1 |

|                    |     |      |       |
|--------------------|-----|------|-------|
| ENSDARE0000084947  | 291 | 48   | 243   |
| ENSDARE0000084965  | 159 | 32.9 | 126.1 |
| ENSDARE0000086184  | 147 | 31.9 | 115.1 |
| ENSDARE0000087130  | 123 | 27.3 | 95.7  |
| ENSDARE0000088400  | 276 | 48.2 | 227.8 |
| ENSDARE0000090314  | 225 | 36.5 | 188.5 |
| ENSDARE0000090814  | 195 | 32.2 | 162.8 |
| ENSDARE0000091411  | 195 | 38.4 | 156.6 |
| ENSDARE0000091637  | 243 | 60.2 | 182.8 |
| ENSDARE0000094396  | 288 | 45.6 | 242.4 |
| ENSDARE0000094570  | 165 | 35.5 | 129.5 |
| ENSDARE0000096996  | 213 | 30.3 | 182.7 |
| ENSDARE0000099680  | 153 | 37.6 | 115.4 |
| ENSDARE00000100150 | 192 | 36.4 | 155.6 |
| ENSDARE00000100785 | 189 | 45   | 144   |
| ENSDARE00000101931 | 156 | 24.9 | 131.1 |
| ENSDARE00000102661 | 159 | 24.8 | 134.2 |
| ENSDARE00000103201 | 165 | 36.7 | 128.3 |
| ENSDARE00000103910 | 207 | 29.1 | 177.9 |
| ENSDARE00000104927 | 150 | 30.9 | 119.1 |
| ENSDARE00000105971 | 168 | 25.8 | 142.2 |
| ENSDARE00000107373 | 183 | 48.5 | 134.5 |
| ENSDARE00000107691 | 153 | 45.3 | 107.7 |
| ENSDARE00000107763 | 177 | 35.1 | 141.9 |
| ENSDARE00000108129 | 147 | 32.1 | 114.9 |
| ENSDARE00000109772 | 150 | 32.4 | 117.6 |
| ENSDARE00000112506 | 150 | 17.4 | 132.6 |
| ENSDARE00000113382 | 162 | 43.4 | 118.6 |
| ENSDARE00000115339 | 228 | 48.3 | 179.7 |
| ENSDARE00000116607 | 165 | 24.9 | 140.1 |
| ENSDARE00000118053 | 171 | 27.2 | 143.8 |
| ENSDARE00000118916 | 195 | 49.8 | 145.2 |
| ENSDARE00000121440 | 207 | 67.8 | 139.2 |
| ENSDARE00000121918 | 195 | 44.2 | 150.8 |
| ENSDARE00000122333 | 180 | 33.8 | 146.2 |
| ENSDARE00000122354 | 186 | 32.1 | 153.9 |
| ENSDARE00000123434 | 159 | 28.6 | 130.4 |
| ENSDARE00000123835 | 153 | 40.3 | 112.7 |
| ENSDARE00000124868 | 159 | 31.8 | 127.2 |
| ENSDARE00000125320 | 261 | 56.3 | 204.7 |
| ENSDARE00000125484 | 174 | 42.1 | 131.9 |
| ENSDARE00000125780 | 210 | 28.7 | 181.3 |

|                    |     |      |       |
|--------------------|-----|------|-------|
| ENSDARE00000125787 | 192 | 39   | 153   |
| ENSDARE00000126058 | 195 | 40.4 | 154.6 |
| ENSDARE00000126479 | 150 | 29.2 | 120.8 |
| ENSDARE00000126733 | 210 | 48.3 | 161.7 |
| ENSDARE00000126765 | 204 | 47.4 | 156.6 |
| ENSDARE00000127465 | 150 | 21.6 | 128.4 |
| ENSDARE00000127604 | 165 | 40.5 | 124.5 |
| ENSDARE00000128359 | 144 | 30   | 114   |
| ENSDARE00000129628 | 222 | 42   | 180   |
| ENSDARE00000130310 | 153 | 28.6 | 124.4 |
| ENSDARE00000131361 | 207 | 64.3 | 142.7 |
| ENSDARE00000132754 | 213 | 32.6 | 180.4 |
| ENSDARE00000132910 | 162 | 32.6 | 129.4 |
| ENSDARE00000134141 | 168 | 53.1 | 114.9 |
| ENSDARE00000134724 | 165 | 41   | 124   |
| ENSDARE00000137614 | 165 | 29.3 | 135.7 |
| ENSDARE00000137754 | 207 | 38   | 169   |
| ENSDARE00000137775 | 210 | 45.8 | 164.2 |
| ENSDARE00000139292 | 171 | 33.9 | 137.1 |
| ENSDARE00000140320 | 195 | 55.7 | 139.3 |
| ENSDARE00000148296 | 183 | 41.7 | 141.3 |
| ENSDARE00000150261 | 174 | 38.5 | 135.5 |
| ENSDARE00000151375 | 180 | 30.9 | 149.1 |
| ENSDARE00000152347 | 174 | 34.8 | 139.2 |
| ENSDARE00000153026 | 162 | 55.6 | 106.4 |
| ENSDARE00000154183 | 171 | 40.3 | 130.7 |
| ENSDARE00000154487 | 186 | 44.4 | 141.6 |
| ENSDARE00000155277 | 204 | 35.4 | 168.6 |
| ENSDARE00000160687 | 195 | 54.1 | 140.9 |
| ENSDARE00000164776 | 186 | 37   | 149   |
| ENSDARE00000165484 | 237 | 63.9 | 173.1 |
| ENSDARE00000166085 | 132 | 29.7 | 102.3 |
| ENSDARE00000166758 | 237 | 34.7 | 202.3 |
| ENSDARE00000166793 | 177 | 35.5 | 141.5 |
| ENSDARE00000172393 | 162 | 36.2 | 125.8 |
| ENSDARE00000172958 | 159 | 38   | 121   |
| ENSDARE00000173051 | 177 | 42.1 | 134.9 |
| ENSDARE00000173073 | 177 | 50.3 | 126.7 |
| ENSDARE00000177117 | 204 | 46.3 | 157.7 |
| ENSDARE00000178146 | 177 | 44.3 | 132.7 |
| ENSDARE00000178165 | 219 | 42.3 | 176.7 |
| ENSDARE00000178193 | 153 | 28.8 | 124.2 |

|                    |     |       |       |
|--------------------|-----|-------|-------|
| ENSDARE00000178648 | 165 | 38.2  | 126.8 |
| ENSDARE00000180981 | 237 | 59.1  | 177.9 |
| ENSDARE00000182322 | 162 | 43.5  | 118.5 |
| ENSDARE00000189560 | 189 | 38.1  | 150.9 |
| ENSDARE00000198896 | 177 | 42.1  | 134.9 |
| ENSDARE00000198987 | 183 | 40.4  | 142.6 |
| ENSDARE00000209100 | 177 | 40.4  | 136.6 |
| ENSDARE00000209111 | 168 | 36.1  | 131.9 |
| ENSDARE00000209689 | 303 | 47.8  | 255.2 |
| ENSDARE00000212642 | 150 | 46    | 104   |
| ENSDARE00000212705 | 204 | 48.2  | 155.8 |
| ENSDARE00000212718 | 186 | 57.7  | 128.3 |
| ENSDARE00000215713 | 144 | 28.1  | 115.9 |
| ENSDARE00000223494 | 147 | 28.8  | 118.2 |
| ENSDARE00000223534 | 135 | 25.4  | 109.6 |
| ENSDARE00000223547 | 153 | 33.5  | 119.5 |
| ENSDARE00000223962 | 177 | 27.8  | 149.2 |
| ENSDARE00000224100 | 165 | 34.3  | 130.7 |
| ENSDARE00000226236 | 156 | 30.2  | 125.8 |
| ENSDARE00000227454 | 183 | 25.7  | 157.3 |
| ENSDARE00000228023 | 282 | 55.4  | 226.6 |
| ENSDARE00000228062 | 153 | 30.6  | 122.4 |
| ENSDARE00000230619 | 192 | 35.4  | 156.6 |
| ENSDARE00000233631 | 144 | 28.2  | 115.8 |
| ENSDARE00000235757 | 171 | 24.6  | 146.4 |
| ENSDARE00000237574 | 174 | 23.5  | 150.5 |
| ENSDARE00000239780 | 213 | 35.9  | 177.1 |
| ENSDARE00000239812 | 210 | 35.7  | 174.3 |
| ENSDARE00000239836 | 195 | 32.2  | 162.8 |
| ENSDARE00000241860 | 132 | 16.6  | 115.4 |
| ENSDARE00000251375 | 168 | 48.6  | 119.4 |
| ENSDARE00000251577 | 267 | 61.9  | 205.1 |
| ENSDARE00000251731 | 168 | 45    | 123   |
| ENSDARE00000251750 | 123 | 34.2  | 88.8  |
| ENSDARE00000252160 | 168 | 32.5  | 135.5 |
| ENSDARE00000252184 | 162 | 35.2  | 126.8 |
| ENSDARE00000252236 | 150 | 41.7  | 108.3 |
| ENSDARE00000254666 | 588 | 153.2 | 434.8 |
| ENSDARE00000264561 | 129 | 24.4  | 104.6 |
| ENSDARE00000267335 | 192 | 38.7  | 153.3 |
| ENSDARE00000267689 | 171 | 42.3  | 128.7 |
| ENSDARE00000267765 | 159 | 30.4  | 128.6 |



|                    |     |       |       |
|--------------------|-----|-------|-------|
| ENSDARE00000275889 | 213 | 31.2  | 181.8 |
| ENSDARE00000277608 | 168 | 30.3  | 137.7 |
| ENSDARE00000279026 | 165 | 18.8  | 146.2 |
| ENSDARE00000279036 | 189 | 31.3  | 157.7 |
| ENSDARE00000281507 | 186 | 38.7  | 147.3 |
| ENSDARE00000281658 | 165 | 20.5  | 144.5 |
| ENSDARE00000288910 | 171 | 45.2  | 125.8 |
| ENSDARE00000289101 | 159 | 50.8  | 108.2 |
| ENSDARE00000290587 | 162 | 33.6  | 128.4 |
| ENSDARE00000294244 | 219 | 61.9  | 157.1 |
| ENSDARE00000294926 | 162 | 39.7  | 122.3 |
| ENSDARE00000295849 | 189 | 44.3  | 144.7 |
| ENSDARE00000297146 | 156 | 31.8  | 124.2 |
| ENSDARE00000303600 | 159 | 35.4  | 123.6 |
| ENSDARE00000303888 | 156 | 32.2  | 123.8 |
| ENSDARE00000306147 | 264 | 71.2  | 192.8 |
| ENSDARE00000308377 | 180 | 32.3  | 147.7 |
| ENSDARE00000309685 | 153 | 31.7  | 121.3 |
| ENSDARE00000311092 | 150 | 25.2  | 124.8 |
| ENSDARE00000311899 | 765 | 179.8 | 585.2 |
| ENSDARE00000317534 | 156 | 42.1  | 113.9 |
| ENSDARE00000318811 | 150 | 36.3  | 113.7 |
| ENSDARE00000319833 | 153 | 29.1  | 123.9 |
| ENSDARE00000320695 | 150 | 37.1  | 112.9 |
| ENSDARE00000322331 | 162 | 41.6  | 120.4 |
| ENSDARE00000323268 | 219 | 23.6  | 195.4 |
| ENSDARE00000323720 | 150 | 47.8  | 102.2 |
| ENSDARE00000324373 | 153 | 46.5  | 106.5 |
| ENSDARE00000325218 | 216 | 50    | 166   |
| ENSDARE00000326118 | 240 | 48.6  | 191.4 |
| ENSDARE00000326400 | 156 | 40.9  | 115.1 |
| ENSDARE00000326477 | 153 | 31    | 122   |
| ENSDARE00000328606 | 165 | 37.8  | 127.2 |
| ENSDARE00000331276 | 147 | 33.2  | 113.8 |
| ENSDARE00000334266 | 192 | 38.9  | 153.1 |
| ENSDARE00000339344 | 132 | 30.3  | 101.7 |
| ENSDARE00000340546 | 195 | 41.3  | 153.7 |
| ENSDARE00000341330 | 162 | 23.6  | 138.4 |
| ENSDARE00000341443 | 144 | 32.8  | 111.2 |
| ENSDARE00000343901 | 213 | 42.7  | 170.3 |
| ENSDARE00000344236 | 201 | 46.8  | 154.2 |
| ENSDARE00000345547 | 174 | 28.3  | 145.7 |

|                    |     |      |       |
|--------------------|-----|------|-------|
| ENSDARE00000346449 | 162 | 33.1 | 128.9 |
| ENSDARE00000346686 | 165 | 25.8 | 139.2 |
| ENSDARE00000347824 | 150 | 42   | 108   |
| ENSDARE00000348439 | 192 | 35.7 | 156.3 |
| ENSDARE00000348874 | 177 | 35.1 | 141.9 |
| ENSDARE00000348937 | 171 | 22.2 | 148.8 |
| ENSDARE00000349395 | 216 | 51.1 | 164.9 |
| ENSDARE00000349696 | 147 | 18.6 | 128.4 |
| ENSDARE00000351117 | 147 | 30.6 | 116.4 |
| ENSDARE00000351453 | 204 | 27.6 | 176.4 |
| ENSDARE00000355082 | 141 | 32.7 | 108.3 |
| ENSDARE00000355222 | 186 | 34.9 | 151.1 |
| ENSDARE00000355248 | 168 | 44.5 | 123.5 |
| ENSDARE00000357236 | 255 | 46.2 | 208.8 |
| ENSDARE00000359261 | 165 | 33.7 | 131.3 |
| ENSDARE00000362140 | 243 | 41.9 | 201.1 |
| ENSDARE00000362911 | 174 | 47.1 | 126.9 |
| ENSDARE00000366347 | 159 | 32.6 | 126.4 |
| ENSDARE00000366349 | 168 | 33.3 | 134.7 |
| ENSDARE00000366350 | 174 | 39.7 | 134.3 |
| ENSDARE00000366351 | 195 | 51   | 144   |
| ENSDARE00000366352 | 228 | 64.4 | 163.6 |
| ENSDARE00000366382 | 174 | 30.4 | 143.6 |
| ENSDARE00000366385 | 210 | 35.5 | 174.5 |
| ENSDARE00000366387 | 183 | 27.4 | 155.6 |
| ENSDARE00000366389 | 174 | 34.2 | 139.8 |
| ENSDARE00000366391 | 150 | 37.6 | 112.4 |
| ENSDARE00000366395 | 201 | 45.4 | 155.6 |
| ENSDARE00000366397 | 174 | 33.8 | 140.2 |
| ENSDARE00000366398 | 174 | 41.9 | 132.1 |
| ENSDARE00000371704 | 183 | 32.7 | 150.3 |
| ENSDARE00000371715 | 216 | 41.9 | 174.1 |
| ENSDARE00000371716 | 219 | 43.2 | 175.8 |
| ENSDARE00000371717 | 207 | 39.6 | 167.4 |
| ENSDARE00000371718 | 225 | 37.8 | 187.2 |
| ENSDARE00000371723 | 159 | 25.1 | 133.9 |
| ENSDARE00000372898 | 150 | 37.1 | 112.9 |
| ENSDARE00000372900 | 171 | 42.1 | 128.9 |
| ENSDARE00000374445 | 138 | 25.7 | 112.3 |
| ENSDARE00000375731 | 123 | 27.7 | 95.3  |
| ENSDARE00000375760 | 153 | 26.9 | 126.1 |
| ENSDARE00000375763 | 207 | 53.9 | 153.1 |

|                    |     |       |       |
|--------------------|-----|-------|-------|
| ENSDARE00000375766 | 177 | 35.9  | 141.1 |
| ENSDARE00000376018 | 189 | 37.9  | 151.1 |
| ENSDARE00000376022 | 246 | 42    | 204   |
| ENSDARE00000376030 | 213 | 34.5  | 178.5 |
| ENSDARE00000376032 | 144 | 25.9  | 118.1 |
| ENSDARE00000376036 | 186 | 32.6  | 153.4 |
| ENSDARE00000376039 | 213 | 60.7  | 152.3 |
| ENSDARE00000376041 | 138 | 35.1  | 102.9 |
| ENSDARE00000376042 | 156 | 44.1  | 111.9 |
| ENSDARE00000382771 | 159 | 40.8  | 118.2 |
| ENSDARE00000382773 | 138 | 30.6  | 107.4 |
| ENSDARE00000385802 | 153 | 42.9  | 110.1 |
| ENSDARE00000385804 | 546 | 123.2 | 422.8 |
| ENSDARE00000385810 | 183 | 41.4  | 141.6 |
| ENSDARE00000385813 | 165 | 40.6  | 124.4 |
| ENSDARE00000385815 | 234 | 55.9  | 178.1 |
| ENSDARE00000386166 | 135 | 27.7  | 107.3 |
| ENSDARE00000386167 | 198 | 43.4  | 154.6 |
| ENSDARE00000386169 | 207 | 38.9  | 168.1 |
| ENSDARE00000386171 | 177 | 34.8  | 142.2 |
| ENSDARE00000386175 | 195 | 45.1  | 149.9 |
| ENSDARE00000386176 | 201 | 39.4  | 161.6 |
| ENSDARE00000389406 | 222 | 53.1  | 168.9 |
| ENSDARE00000389857 | 165 | 44.8  | 120.2 |
| ENSDARE00000389876 | 852 | 269.5 | 582.5 |
| ENSDARE00000389893 | 237 | 65.6  | 171.4 |
| ENSDARE00000389928 | 255 | 67.6  | 187.4 |
| ENSDARE00000393774 | 183 | 36.9  | 146.1 |
| ENSDARE00000397253 | 165 | 29.6  | 135.4 |
| ENSDARE00000397315 | 150 | 29.8  | 120.2 |
| ENSDARE00000399344 | 180 | 35.9  | 144.1 |
| ENSDARE00000399353 | 177 | 44.7  | 132.3 |
| ENSDARE00000401798 | 147 | 27.4  | 119.6 |
| ENSDARE00000401799 | 273 | 59.3  | 213.7 |
| ENSDARE00000402489 | 171 | 40    | 131   |
| ENSDARE00000402490 | 159 | 37.9  | 121.1 |
| ENSDARE00000402497 | 162 | 23.4  | 138.6 |
| ENSDARE00000402561 | 153 | 40.2  | 112.8 |
| ENSDARE00000402563 | 156 | 33.1  | 122.9 |
| ENSDARE00000402564 | 180 | 32.8  | 147.2 |
| ENSDARE00000402972 | 174 | 52.6  | 121.4 |
| ENSDARE00000402979 | 177 | 46.2  | 130.8 |

|                    |     |      |       |
|--------------------|-----|------|-------|
| ENSDARE00000402982 | 156 | 47.4 | 108.6 |
| ENSDARE00000407906 | 150 | 30.9 | 119.1 |
| ENSDARE00000408780 | 153 | 28.2 | 124.8 |
| ENSDARE00000408809 | 192 | 37.9 | 154.1 |
| ENSDARE00000408813 | 213 | 51   | 162   |
| ENSDARE00000408815 | 153 | 39.4 | 113.6 |
| ENSDARE00000408817 | 189 | 39.7 | 149.3 |
| ENSDARE00000413898 | 189 | 29.1 | 159.9 |
| ENSDARE00000413900 | 162 | 27.5 | 134.5 |
| ENSDARE00000413903 | 219 | 35.5 | 183.5 |
| ENSDARE00000413909 | 216 | 30.2 | 185.8 |
| ENSDARE00000416314 | 183 | 37.9 | 145.1 |
| ENSDARE00000416315 | 231 | 37.2 | 193.8 |
| ENSDARE00000416316 | 171 | 43.7 | 127.3 |
| ENSDARE00000416323 | 147 | 24.1 | 122.9 |
| ENSDARE00000416326 | 222 | 40.4 | 181.6 |
| ENSDARE00000416327 | 159 | 39.5 | 119.5 |
| ENSDARE00000416328 | 174 | 31.6 | 142.4 |
| ENSDARE00000416329 | 204 | 40.9 | 163.1 |
| ENSDARE00000416341 | 159 | 31.3 | 127.7 |
| ENSDARE00000416343 | 177 | 37.7 | 139.3 |
| ENSDARE00000416345 | 192 | 44.8 | 147.2 |
| ENSDARE00000416347 | 180 | 50.9 | 129.1 |
| ENSDARE00000420020 | 138 | 35.4 | 102.6 |
| ENSDARE00000422536 | 180 | 23.8 | 156.2 |
| ENSDARE00000422540 | 201 | 44.1 | 156.9 |
| ENSDARE00000424684 | 183 | 29.8 | 153.2 |
| ENSDARE00000424686 | 156 | 38.1 | 117.9 |
| ENSDARE00000425118 | 228 | 24.3 | 203.7 |
| ENSDARE00000428437 | 165 | 34.7 | 130.3 |
| ENSDARE00000428440 | 195 | 38.5 | 156.5 |
| ENSDARE00000428445 | 168 | 35.2 | 132.8 |
| ENSDARE00000439469 | 156 | 46.7 | 109.3 |
| ENSDARE00000439473 | 177 | 37.5 | 139.5 |
| ENSDARE00000439477 | 174 | 38.7 | 135.3 |
| ENSDARE00000439484 | 189 | 57.2 | 131.8 |
| ENSDARE00000439488 | 294 | 79.8 | 214.2 |
| ENSDARE00000439491 | 333 | 69.5 | 263.5 |
| ENSDARE00000439497 | 189 | 44.8 | 144.2 |
| ENSDARE00000439499 | 165 | 47.6 | 117.4 |
| ENSDARE00000439502 | 156 | 42   | 114   |
| ENSDARE00000439505 | 153 | 36.2 | 116.8 |

|                    |     |      |       |
|--------------------|-----|------|-------|
| ENSDARE00000443878 | 177 | 39.1 | 137.9 |
| ENSDARE00000443884 | 243 | 26.8 | 216.2 |
| ENSDARE00000444017 | 174 | 58.3 | 115.7 |
| ENSDARE00000444026 | 174 | 50.6 | 123.4 |
| ENSDARE00000446813 | 168 | 32.8 | 135.2 |
| ENSDARE00000446836 | 270 | 51.1 | 218.9 |
| ENSDARE00000446858 | 192 | 37.2 | 154.8 |
| ENSDARE00000446862 | 174 | 31   | 143   |
| ENSDARE00000446867 | 243 | 42.5 | 200.5 |
| ENSDARE00000446871 | 162 | 44.2 | 117.8 |
| ENSDARE00000446881 | 213 | 51.5 | 161.5 |
| ENSDARE00000447487 | 153 | 44.9 | 108.1 |
| ENSDARE00000450451 | 186 | 46.4 | 139.6 |
| ENSDARE00000450459 | 162 | 43.8 | 118.2 |
| ENSDARE00000450810 | 147 | 33.5 | 113.5 |
| ENSDARE00000451744 | 216 | 47   | 169   |
| ENSDARE00000451753 | 156 | 28.6 | 127.4 |
| ENSDARE00000453028 | 198 | 38.7 | 159.3 |
| ENSDARE00000456412 | 147 | 29.3 | 117.7 |
| ENSDARE00000456480 | 177 | 41.7 | 135.3 |
| ENSDARE00000456502 | 144 | 34.2 | 109.8 |
| ENSDARE00000456512 | 228 | 42   | 186   |
| ENSDARE00000456519 | 138 | 39.5 | 98.5  |
| ENSDARE00000456534 | 153 | 22.4 | 130.6 |
| ENSDARE00000456569 | 210 | 42.9 | 167.1 |
| ENSDARE00000456717 | 213 | 44.3 | 168.7 |
| ENSDARE00000456729 | 132 | 31.9 | 100.1 |
| ENSDARE00000457758 | 204 | 36   | 168   |
| ENSDARE00000458979 | 159 | 37.8 | 121.2 |
| ENSDARE00000458983 | 186 | 43.2 | 142.8 |
| ENSDARE00000458985 | 210 | 36   | 174   |
| ENSDARE00000458993 | 144 | 26   | 118   |
| ENSDARE00000459428 | 156 | 41.5 | 114.5 |
| ENSDARE00000459433 | 234 | 55.9 | 178.1 |
| ENSDARE00000459435 | 288 | 62.1 | 225.9 |
| ENSDARE00000459456 | 183 | 35.8 | 147.2 |
| ENSDARE00000459464 | 168 | 41.5 | 126.5 |
| ENSDARE00000459473 | 159 | 41   | 118   |
| ENSDARE00000459479 | 198 | 50.9 | 147.1 |
| ENSDARE00000459492 | 249 | 68.5 | 180.5 |
| ENSDARE00000459505 | 192 | 46.8 | 145.2 |
| ENSDARE00000459514 | 150 | 39.2 | 110.8 |

|                    |     |      |       |
|--------------------|-----|------|-------|
| ENSDARE00000459519 | 168 | 44   | 124   |
| ENSDARE00000459521 | 183 | 43.3 | 139.7 |
| ENSDARE00000459530 | 273 | 77.9 | 195.1 |
| ENSDARE00000459532 | 144 | 31.3 | 112.7 |
| ENSDARE00000465123 | 231 | 31.7 | 199.3 |
| ENSDARE00000465146 | 126 | 33.2 | 92.8  |
| ENSDARE00000465151 | 168 | 39.9 | 128.1 |
| ENSDARE00000465152 | 162 | 19   | 143   |
| ENSDARE00000468545 | 189 | 36.3 | 152.7 |
| ENSDARE00000468552 | 168 | 46.1 | 121.9 |
| ENSDARE00000468560 | 153 | 41.5 | 111.5 |
| ENSDARE00000468629 | 156 | 31.5 | 124.5 |
| ENSDARE00000468684 | 252 | 39.1 | 212.9 |
| ENSDARE00000468775 | 189 | 47   | 142   |
| ENSDARE00000472748 | 201 | 37.2 | 163.8 |
| ENSDARE00000472764 | 162 | 34.4 | 127.6 |
| ENSDARE00000472768 | 180 | 39.5 | 140.5 |
| ENSDARE00000472821 | 195 | 50.7 | 144.3 |
| ENSDARE00000472827 | 198 | 40.7 | 157.3 |
| ENSDARE00000472831 | 183 | 46.6 | 136.4 |
| ENSDARE00000472833 | 228 | 38.8 | 189.2 |
| ENSDARE00000472841 | 150 | 20.1 | 129.9 |
| ENSDARE00000473568 | 153 | 33.2 | 119.8 |
| ENSDARE00000478911 | 198 | 38.7 | 159.3 |
| ENSDARE00000479753 | 171 | 37.3 | 133.7 |
| ENSDARE00000483307 | 180 | 38.7 | 141.3 |
| ENSDARE00000483315 | 159 | 33.9 | 125.1 |
| ENSDARE00000485532 | 189 | 46.8 | 142.2 |
| ENSDARE00000485565 | 186 | 33.3 | 152.7 |
| ENSDARE00000485576 | 264 | 57.6 | 206.4 |
| ENSDARE00000485597 | 171 | 23.2 | 147.8 |
| ENSDARE00000486982 | 195 | 38   | 157   |
| ENSDARE00000486984 | 186 | 43.8 | 142.2 |
| ENSDARE00000489631 | 153 | 27.9 | 125.1 |
| ENSDARE00000490003 | 129 | 27.7 | 101.3 |
| ENSDARE00000490006 | 174 | 32.7 | 141.3 |
| ENSDARE00000490008 | 186 | 29   | 157   |
| ENSDARE00000490009 | 192 | 43.2 | 148.8 |
| ENSDARE00000490010 | 255 | 37   | 218   |
| ENSDARE00000490014 | 198 | 48.4 | 149.6 |
| ENSDARE00000490015 | 234 | 49.3 | 184.7 |
| ENSDARE00000496668 | 189 | 36.3 | 152.7 |

|                    |     |       |       |
|--------------------|-----|-------|-------|
| ENSDARE00000497324 | 159 | 38.7  | 120.3 |
| ENSDARE00000497332 | 261 | 77.2  | 183.8 |
| ENSDARE00000501488 | 177 | 48.8  | 128.2 |
| ENSDARE00000503458 | 198 | 32.2  | 165.8 |
| ENSDARE00000504303 | 189 | 39.4  | 149.6 |
| ENSDARE00000504759 | 195 | 31.2  | 163.8 |
| ENSDARE00000504760 | 174 | 44.1  | 129.9 |
| ENSDARE00000504763 | 177 | 27.6  | 149.4 |
| ENSDARE00000505244 | 165 | 23.1  | 141.9 |
| ENSDARE00000506166 | 177 | 43.2  | 133.8 |
| ENSDARE00000506558 | 135 | 42.3  | 92.7  |
| ENSDARE00000508566 | 126 | 26.5  | 99.5  |
| ENSDARE00000508573 | 159 | 37.5  | 121.5 |
| ENSDARE00000508577 | 168 | 37    | 131   |
| ENSDARE00000508579 | 159 | 18.9  | 140.1 |
| ENSDARE00000508581 | 168 | 49    | 119   |
| ENSDARE00000508584 | 177 | 40.6  | 136.4 |
| ENSDARE00000508588 | 153 | 34.1  | 118.9 |
| ENSDARE00000508589 | 174 | 40.7  | 133.3 |
| ENSDARE00000508592 | 198 | 45.8  | 152.2 |
| ENSDARE00000508594 | 201 | 33.2  | 167.8 |
| ENSDARE00000508597 | 192 | 26.6  | 165.4 |
| ENSDARE00000508599 | 168 | 37    | 131   |
| ENSDARE00000508612 | 150 | 24.6  | 125.4 |
| ENSDARE00000508772 | 153 | 23.6  | 129.4 |
| ENSDARE00000508848 | 159 | 25.8  | 133.2 |
| ENSDARE00000509941 | 156 | 37    | 119   |
| ENSDARE00000509943 | 207 | 52.3  | 154.7 |
| ENSDARE00000509946 | 231 | 45.6  | 185.4 |
| ENSDARE00000509950 | 204 | 45.6  | 158.4 |
| ENSDARE00000513313 | 159 | 29.8  | 129.2 |
| ENSDARE00000513321 | 162 | 29.3  | 132.7 |
| ENSDARE00000513323 | 450 | 116.7 | 333.3 |
| ENSDARE00000513331 | 129 | 17.5  | 111.5 |
| ENSDARE00000523058 | 171 | 36.7  | 134.3 |
| ENSDARE00000523062 | 153 | 32.1  | 120.9 |
| ENSDARE00000523073 | 123 | 31.7  | 91.3  |
| ENSDARE00000523079 | 177 | 31.6  | 145.4 |
| ENSDARE00000523834 | 156 | 46.3  | 109.7 |
| ENSDARE00000523835 | 129 | 33.5  | 95.5  |
| ENSDARE00000523837 | 177 | 42.6  | 134.4 |
| ENSDARE00000523839 | 189 | 52.2  | 136.8 |



|                    |     |      |       |
|--------------------|-----|------|-------|
| ENSDARE00000523840 | 198 | 53.3 | 144.7 |
| ENSDARE00000526274 | 210 | 40.2 | 169.8 |
| ENSDARE00000526277 | 144 | 27.9 | 116.1 |
| ENSDARE00000526279 | 168 | 42.6 | 125.4 |
| ENSDARE00000526284 | 162 | 30.2 | 131.8 |
| ENSDARE00000526781 | 159 | 32   | 127   |
| ENSDARE00000526790 | 168 | 30.9 | 137.1 |
| ENSDARE00000526816 | 192 | 45.1 | 146.9 |
| ENSDARE00000526820 | 210 | 55   | 155   |
| ENSDARE00000529148 | 180 | 36.6 | 143.4 |
| ENSDARE00000529160 | 177 | 29.6 | 147.4 |
| ENSDARE00000530930 | 153 | 23.1 | 129.9 |
| ENSDARE00000530935 | 168 | 37.9 | 130.1 |
| ENSDARE00000530942 | 159 | 32.9 | 126.1 |
| ENSDARE00000530947 | 150 | 32.2 | 117.8 |
| ENSDARE00000530950 | 138 | 22.6 | 115.4 |
| ENSDARE00000533901 | 159 | 34.9 | 124.1 |
| ENSDARE00000533907 | 162 | 37.9 | 124.1 |
| ENSDARE00000533915 | 216 | 46.7 | 169.3 |
| ENSDARE00000533920 | 189 | 44.2 | 144.8 |
| ENSDARE00000533921 | 153 | 33.6 | 119.4 |
| ENSDARE00000533933 | 153 | 34.4 | 118.6 |
| ENSDARE00000533952 | 171 | 48.8 | 122.2 |
| ENSDARE00000533965 | 168 | 35.4 | 132.6 |
| ENSDARE00000533998 | 177 | 42   | 135   |
| ENSDARE00000534001 | 177 | 34.5 | 142.5 |
| ENSDARE00000534004 | 198 | 34.1 | 163.9 |
| ENSDARE00000534009 | 231 | 63.5 | 167.5 |
| ENSDARE00000534031 | 162 | 39.5 | 122.5 |
| ENSDARE00000534038 | 222 | 42.3 | 179.7 |
| ENSDARE00000534061 | 198 | 53.6 | 144.4 |
| ENSDARE00000534100 | 156 | 37.9 | 118.1 |
| ENSDARE00000534136 | 195 | 48.8 | 146.2 |
| ENSDARE00000534139 | 177 | 54.5 | 122.5 |
| ENSDARE00000535855 | 159 | 34.9 | 124.1 |
| ENSDARE00000535865 | 159 | 32.6 | 126.4 |
| ENSDARE00000535873 | 159 | 45.3 | 113.7 |
| ENSDARE00000536226 | 237 | 43   | 194   |
| ENSDARE00000536231 | 135 | 30   | 105   |
| ENSDARE00000537215 | 156 | 34.4 | 121.6 |
| ENSDARE00000537228 | 147 | 29.4 | 117.6 |
| ENSDARE00000537268 | 225 | 47.3 | 177.7 |

|                    |     |       |       |
|--------------------|-----|-------|-------|
| ENSDARE00000537287 | 162 | 33.5  | 128.5 |
| ENSDARE00000537310 | 162 | 29.1  | 132.9 |
| ENSDARE00000537366 | 165 | 37.8  | 127.2 |
| ENSDARE00000537409 | 150 | 37.5  | 112.5 |
| ENSDARE00000537564 | 207 | 52.9  | 154.1 |
| ENSDARE00000538436 | 255 | 63.5  | 191.5 |
| ENSDARE00000544279 | 231 | 55    | 176   |
| ENSDARE00000544282 | 168 | 49.3  | 118.7 |
| ENSDARE00000544296 | 120 | 30.7  | 89.3  |
| ENSDARE00000544992 | 177 | 41.7  | 135.3 |
| ENSDARE00000546183 | 183 | 50.2  | 132.8 |
| ENSDARE00000546198 | 183 | 39.9  | 143.1 |
| ENSDARE00000546213 | 189 | 55.1  | 133.9 |
| ENSDARE00000548381 | 150 | 25.2  | 124.8 |
| ENSDARE00000548487 | 150 | 27.5  | 122.5 |
| ENSDARE00000548535 | 156 | 33.6  | 122.4 |
| ENSDARE00000548618 | 171 | 29.2  | 141.8 |
| ENSDARE00000551653 | 150 | 41.5  | 108.5 |
| ENSDARE00000553760 | 177 | 37.8  | 139.2 |
| ENSDARE00000553769 | 150 | 40.7  | 109.3 |
| ENSDARE00000553777 | 168 | 48.2  | 119.8 |
| ENSDARE00000553792 | 147 | 30.4  | 116.6 |
| ENSDARE00000556339 | 141 | 31.4  | 109.6 |
| ENSDARE00000556709 | 213 | 37.4  | 175.6 |
| ENSDARE00000556737 | 240 | 34.9  | 205.1 |
| ENSDARE00000556780 | 243 | 50.6  | 192.4 |
| ENSDARE00000556793 | 180 | 33.3  | 146.7 |
| ENSDARE00000556816 | 192 | 46.6  | 145.4 |
| ENSDARE00000556832 | 192 | 36.6  | 155.4 |
| ENSDARE00000558520 | 168 | 35.6  | 132.4 |
| ENSDARE00000562216 | 174 | 33.6  | 140.4 |
| ENSDARE00000562231 | 192 | 43.5  | 148.5 |
| ENSDARE00000562278 | 234 | 51.6  | 182.4 |
| ENSDARE00000562365 | 198 | 37.8  | 160.2 |
| ENSDARE00000562369 | 207 | 47.1  | 159.9 |
| ENSDARE00000562431 | 165 | 43    | 122   |
| ENSDARE00000562462 | 213 | 44    | 169   |
| ENSDARE00000562476 | 249 | 71.1  | 177.9 |
| ENSDARE00000562503 | 450 | 127.5 | 322.5 |
| ENSDARE00000564106 | 150 | 28    | 122   |
| ENSDARE00000564170 | 192 | 59.4  | 132.6 |
| ENSDARE00000565432 | 186 | 40.7  | 145.3 |

|                    |     |       |       |
|--------------------|-----|-------|-------|
| ENSDARE00000565442 | 174 | 36    | 138   |
| ENSDARE00000565444 | 180 | 33.6  | 146.4 |
| ENSDARE00000565452 | 171 | 41.3  | 129.7 |
| ENSDARE00000565466 | 237 | 50.2  | 186.8 |
| ENSDARE00000565486 | 150 | 37.4  | 112.6 |
| ENSDARE00000565499 | 165 | 38.5  | 126.5 |
| ENSDARE00000565539 | 327 | 57.9  | 269.1 |
| ENSDARE00000567260 | 246 | 57.5  | 188.5 |
| ENSDARE00000567274 | 159 | 35    | 124   |
| ENSDARE00000568871 | 144 | 25    | 119   |
| ENSDARE00000569324 | 156 | 37    | 119   |
| ENSDARE00000569362 | 231 | 52.8  | 178.2 |
| ENSDARE00000569389 | 180 | 36.9  | 143.1 |
| ENSDARE00000569406 | 228 | 47.2  | 180.8 |
| ENSDARE00000569434 | 159 | 37.5  | 121.5 |
| ENSDARE00000569498 | 189 | 41    | 148   |
| ENSDARE00000569569 | 168 | 37.6  | 130.4 |
| ENSDARE00000569582 | 228 | 54.1  | 173.9 |
| ENSDARE00000571584 | 225 | 46.9  | 178.1 |
| ENSDARE00000573221 | 183 | 34    | 149   |
| ENSDARE00000574770 | 165 | 43.5  | 121.5 |
| ENSDARE00000574783 | 273 | 58.6  | 214.4 |
| ENSDARE00000574792 | 240 | 63.4  | 176.6 |
| ENSDARE00000580006 | 201 | 36.8  | 164.2 |
| ENSDARE00000580140 | 267 | 62.9  | 204.1 |
| ENSDARE00000580160 | 198 | 42    | 156   |
| ENSDARE00000581236 | 153 | 30.3  | 122.7 |
| ENSDARE00000581255 | 195 | 37.8  | 157.2 |
| ENSDARE00000581287 | 195 | 33.6  | 161.4 |
| ENSDARE00000583666 | 165 | 36.1  | 128.9 |
| ENSDARE00000583775 | 150 | 32.8  | 117.2 |
| ENSDARE00000583807 | 183 | 42.5  | 140.5 |
| ENSDARE00000583815 | 156 | 36.4  | 119.6 |
| ENSDARE00000583835 | 156 | 34.7  | 121.3 |
| ENSDARE00000583845 | 150 | 19.9  | 130.1 |
| ENSDARE00000583885 | 162 | 35.4  | 126.6 |
| ENSDARE00000583896 | 138 | 28.5  | 109.5 |
| ENSDARE00000583908 | 975 | 266.3 | 708.7 |
| ENSDARE00000585921 | 177 | 34.8  | 142.2 |
| ENSDARE00000585929 | 168 | 34.2  | 133.8 |
| ENSDARE00000585960 | 198 | 44.8  | 153.2 |
| ENSDARE00000585974 | 174 | 44.5  | 129.5 |

|                    |     |      |       |
|--------------------|-----|------|-------|
| ENSDARE00000586007 | 183 | 40.8 | 142.2 |
| ENSDARE00000587231 | 216 | 37.9 | 178.1 |
| ENSDARE00000587257 | 159 | 33.3 | 125.7 |
| ENSDARE00000587275 | 189 | 48.3 | 140.7 |
| ENSDARE00000587329 | 177 | 43   | 134   |
| ENSDARE00000587342 | 213 | 61.5 | 151.5 |
| ENSDARE00000587360 | 144 | 41.1 | 102.9 |
| ENSDARE00000589576 | 195 | 36.9 | 158.1 |
| ENSDARE00000589581 | 192 | 37.4 | 154.6 |
| ENSDARE00000589604 | 171 | 27.3 | 143.7 |
| ENSDARE00000589610 | 198 | 38.9 | 159.1 |
| ENSDARE00000590769 | 153 | 44.6 | 108.4 |
| ENSDARE00000590855 | 144 | 28.1 | 115.9 |
| ENSDARE00000590979 | 198 | 54.4 | 143.6 |
| ENSDARE00000590988 | 192 | 40.4 | 151.6 |
| ENSDARE00000591013 | 156 | 33.4 | 122.6 |
| ENSDARE00000591106 | 186 | 43.2 | 142.8 |
| ENSDARE00000591114 | 237 | 47.2 | 189.8 |
| ENSDARE00000591122 | 210 | 49   | 161   |
| ENSDARE00000591140 | 183 | 51.4 | 131.6 |
| ENSDARE00000591148 | 186 | 44.3 | 141.7 |
| ENSDARE00000591155 | 150 | 39.5 | 110.5 |
| ENSDARE00000591182 | 174 | 51.4 | 122.6 |
| ENSDARE00000591202 | 228 | 64.8 | 163.2 |
| ENSDARE00000591211 | 156 | 35.5 | 120.5 |
| ENSDARE00000591230 | 135 | 35.4 | 99.6  |
| ENSDARE00000592670 | 153 | 33.9 | 119.1 |
| ENSDARE00000594244 | 201 | 45.1 | 155.9 |
| ENSDARE00000594268 | 165 | 24.7 | 140.3 |
| ENSDARE00000594317 | 159 | 16.5 | 142.5 |
| ENSDARE00000594319 | 150 | 29   | 121   |
| ENSDARE00000594328 | 246 | 35.6 | 210.4 |
| ENSDARE00000595847 | 225 | 59   | 166   |
| ENSDARE00000595869 | 135 | 35.8 | 99.2  |
| ENSDARE00000595888 | 189 | 45.7 | 143.3 |
| ENSDARE00000595896 | 174 | 46.9 | 127.1 |
| ENSDARE00000595900 | 162 | 31   | 131   |
| ENSDARE00000602242 | 174 | 35   | 139   |
| ENSDARE00000602243 | 186 | 30.3 | 155.7 |
| ENSDARE00000602248 | 159 | 35.1 | 123.9 |
| ENSDARE00000602253 | 225 | 39.5 | 185.5 |
| ENSDARE00000602255 | 129 | 29   | 100   |

|                    |     |      |       |
|--------------------|-----|------|-------|
| ENSDARE00000602261 | 150 | 41   | 109   |
| ENSDARE00000602266 | 234 | 44.6 | 189.4 |
| ENSDARE00000602268 | 162 | 32.9 | 129.1 |
| ENSDARE00000602270 | 246 | 49.6 | 196.4 |
| ENSDARE00000602988 | 159 | 35.1 | 123.9 |
| ENSDARE00000602989 | 150 | 29.6 | 120.4 |
| ENSDARE00000603094 | 186 | 29.6 | 156.4 |
| ENSDARE00000603632 | 192 | 50   | 142   |
| ENSDARE00000603645 | 237 | 40.2 | 196.8 |
| ENSDARE00000603661 | 159 | 36.4 | 122.6 |
| ENSDARE00000603668 | 159 | 36.4 | 122.6 |
| ENSDARE00000603671 | 246 | 64.9 | 181.1 |
| ENSDARE00000603682 | 168 | 23.9 | 144.1 |
| ENSDARE00000603685 | 180 | 42.1 | 137.9 |
| ENSDARE00000603689 | 177 | 40.6 | 136.4 |
| ENSDARE00000603693 | 195 | 34.6 | 160.4 |
| ENSDARE00000603701 | 156 | 45.3 | 110.7 |
| ENSDARE00000603709 | 174 | 27.3 | 146.7 |
| ENSDARE00000603720 | 159 | 36.5 | 122.5 |
| ENSDARE00000603725 | 192 | 49.9 | 142.1 |
| ENSDARE00000603731 | 282 | 97.1 | 184.9 |
| ENSDARE00000605727 | 165 | 44.9 | 120.1 |
| ENSDARE00000605752 | 144 | 40.1 | 103.9 |
| ENSDARE00000605759 | 159 | 35.3 | 123.7 |
| ENSDARE00000605767 | 147 | 25.9 | 121.1 |
| ENSDARE00000605816 | 171 | 47.1 | 123.9 |
| ENSDARE00000606680 | 168 | 36.4 | 131.6 |
| ENSDARE00000608517 | 195 | 55.1 | 139.9 |
| ENSDARE00000608522 | 162 | 48.4 | 113.6 |
| ENSDARE00000608534 | 195 | 49.7 | 145.3 |
| ENSDARE00000608544 | 249 | 69.4 | 179.6 |
| ENSDARE00000608549 | 150 | 41.8 | 108.2 |
| ENSDARE00000608553 | 141 | 30.7 | 110.3 |
| ENSDARE00000608554 | 132 | 31.5 | 100.5 |
| ENSDARE00000608557 | 135 | 33.9 | 101.1 |
| ENSDARE00000608731 | 144 | 35.9 | 108.1 |
| ENSDARE00000611768 | 210 | 31.4 | 178.6 |
| ENSDARE00000611777 | 144 | 36.5 | 107.5 |
| ENSDARE00000611790 | 162 | 35   | 127   |
| ENSDARE00000613322 | 183 | 34.4 | 148.6 |
| ENSDARE00000613356 | 192 | 28.9 | 163.1 |
| ENSDARE00000613365 | 174 | 23   | 151   |

|                    |     |      |       |
|--------------------|-----|------|-------|
| ENSDARE00000613377 | 207 | 28.8 | 178.2 |
| ENSDARE00000613408 | 171 | 23.5 | 147.5 |
| ENSDARE00000613416 | 159 | 37.4 | 121.6 |
| ENSDARE00000613420 | 198 | 36.2 | 161.8 |
| ENSDARE00000613426 | 159 | 32.6 | 126.4 |
| ENSDARE00000613434 | 195 | 45.8 | 149.2 |
| ENSDARE00000613438 | 150 | 34.8 | 115.2 |
| ENSDARE00000613483 | 159 | 35.1 | 123.9 |
| ENSDARE00000613495 | 153 | 33.8 | 119.2 |
| ENSDARE00000613501 | 171 | 34.3 | 136.7 |
| ENSDARE00000613509 | 144 | 36.2 | 107.8 |
| ENSDARE00000613512 | 162 | 37.6 | 124.4 |
| ENSDARE00000613521 | 198 | 43.4 | 154.6 |
| ENSDARE00000613523 | 174 | 43.9 | 130.1 |
| ENSDARE00000613531 | 147 | 31.4 | 115.6 |
| ENSDARE00000613548 | 177 | 45.8 | 131.2 |
| ENSDARE00000613565 | 180 | 40.2 | 139.8 |
| ENSDARE00000622317 | 168 | 42.2 | 125.8 |
| ENSDARE00000622382 | 249 | 42.8 | 206.2 |
| ENSDARE00000622479 | 171 | 31.8 | 139.2 |
| ENSDARE00000622496 | 156 | 32.8 | 123.2 |
| ENSDARE00000622516 | 363 | 79.8 | 283.2 |
| ENSDARE00000626482 | 156 | 35.8 | 120.2 |
| ENSDARE00000626490 | 141 | 38.1 | 102.9 |
| ENSDARE00000626537 | 126 | 24.5 | 101.5 |
| ENSDARE00000631104 | 177 | 37.8 | 139.2 |
| ENSDARE00000631111 | 201 | 44.1 | 156.9 |
| ENSDARE00000631113 | 156 | 42.3 | 113.7 |
| ENSDARE00000631126 | 168 | 44.3 | 123.7 |
| ENSDARE00000631133 | 150 | 31.9 | 118.1 |
| ENSDARE00000631142 | 195 | 47   | 148   |
| ENSDARE00000631157 | 186 | 41.2 | 144.8 |
| ENSDARE00000631169 | 198 | 39.6 | 158.4 |
| ENSDARE00000631180 | 150 | 31   | 119   |
| ENSDARE00000631194 | 198 | 36.4 | 161.6 |
| ENSDARE00000631349 | 213 | 36.7 | 176.3 |
| ENSDARE00000631352 | 183 | 31.4 | 151.6 |
| ENSDARE00000631359 | 177 | 32.6 | 144.4 |
| ENSDARE00000631365 | 222 | 37.5 | 184.5 |
| ENSDARE00000631390 | 207 | 30.3 | 176.7 |
| ENSDARE00000638012 | 162 | 43.2 | 118.8 |
| ENSDARE00000638027 | 204 | 47.1 | 156.9 |

|                    |      |       |       |
|--------------------|------|-------|-------|
| ENSDARE00000638037 | 147  | 42.7  | 104.3 |
| ENSDARE00000638051 | 156  | 45.7  | 110.3 |
| ENSDARE00000638113 | 261  | 48.5  | 212.5 |
| ENSDARE00000638598 | 1212 | 238.7 | 973.3 |
| ENSDARE00000638639 | 180  | 45.6  | 134.4 |
| ENSDARE00000638675 | 186  | 34.8  | 151.2 |
| ENSDARE00000638723 | 204  | 52.1  | 151.9 |
| ENSDARE00000638727 | 225  | 52.6  | 172.4 |
| ENSDARE00000638734 | 156  | 34.3  | 121.7 |
| ENSDARE00000638745 | 165  | 41.5  | 123.5 |
| ENSDARE00000638764 | 162  | 39.4  | 122.6 |
| ENSDARE00000639000 | 165  | 24.6  | 140.4 |
| ENSDARE00000639007 | 159  | 28.5  | 130.5 |
| ENSDARE00000639013 | 150  | 34.5  | 115.5 |
| ENSDARE00000639034 | 156  | 36.3  | 119.7 |
| ENSDARE00000639040 | 150  | 34.9  | 115.1 |
| ENSDARE00000639401 | 192  | 31.5  | 160.5 |
| ENSDARE00000639474 | 177  | 36.6  | 140.4 |
| ENSDARE00000639484 | 195  | 40.7  | 154.3 |
| ENSDARE00000639510 | 186  | 31    | 155   |
| ENSDARE00000639922 | 189  | 51.8  | 137.2 |
| ENSDARE00000639973 | 144  | 21.8  | 122.2 |
| ENSDARE00000640009 | 183  | 42.3  | 140.7 |
| ENSDARE00000640043 | 240  | 48.8  | 191.2 |
| ENSDARE00000640053 | 219  | 43.3  | 175.7 |
| ENSDARE00000642104 | 156  | 38.7  | 117.3 |
| ENSDARE00000642113 | 150  | 32    | 118   |
| ENSDARE00000642143 | 159  | 26    | 133   |
| ENSDARE00000642191 | 180  | 40.5  | 139.5 |
| ENSDARE00000642207 | 168  | 32.5  | 135.5 |
| ENSDARE00000642237 | 237  | 42.5  | 194.5 |
| ENSDARE00000643776 | 177  | 34.4  | 142.6 |
| ENSDARE00000643815 | 759  | 144.5 | 614.5 |
| ENSDARE00000643830 | 195  | 31.7  | 163.3 |
| ENSDARE00000643853 | 162  | 30.4  | 131.6 |
| ENSDARE00000643865 | 135  | 25.9  | 109.1 |
| ENSDARE00000643873 | 159  | 37.3  | 121.7 |
| ENSDARE00000645582 | 168  | 37.5  | 130.5 |
| ENSDARE00000645589 | 150  | 38.9  | 111.1 |
| ENSDARE00000645600 | 153  | 38.4  | 114.6 |
| ENSDARE00000645622 | 162  | 37    | 125   |
| ENSDARE00000646383 | 168  | 39.8  | 128.2 |

|                    |     |      |       |
|--------------------|-----|------|-------|
| ENSDARE00000646475 | 189 | 43.5 | 145.5 |
| ENSDARE00000646520 | 147 | 34.8 | 112.2 |
| ENSDARE00000646559 | 141 | 37.7 | 103.3 |
| ENSDARE00000649754 | 144 | 33.1 | 110.9 |
| ENSDARE00000649836 | 156 | 32.2 | 123.8 |
| ENSDARE00000655720 | 258 | 66.9 | 191.1 |
| ENSDARE00000655752 | 171 | 36.2 | 134.8 |
| ENSDARE00000656788 | 162 | 41.1 | 120.9 |
| ENSDARE00000656808 | 219 | 41.5 | 177.5 |
| ENSDARE00000656857 | 165 | 41.1 | 123.9 |
| ENSDARE00000657082 | 174 | 38.5 | 135.5 |
| ENSDARE00000657180 | 180 | 41.2 | 138.8 |
| ENSDARE00000657193 | 213 | 51.3 | 161.7 |
| ENSDARE00000657199 | 207 | 40   | 167   |
| ENSDARE00000659145 | 141 | 29.3 | 111.7 |
| ENSDARE00000659318 | 183 | 38.9 | 144.1 |
| ENSDARE00000660583 | 138 | 23.5 | 114.5 |
| ENSDARE00000663129 | 189 | 39   | 150   |
| ENSDARE00000663151 | 153 | 40.2 | 112.8 |
| ENSDARE00000663161 | 150 | 40.9 | 109.1 |
| ENSDARE00000663942 | 147 | 29.5 | 117.5 |
| ENSDARE00000664040 | 225 | 47.1 | 177.9 |
| ENSDARE00000664051 | 153 | 37.8 | 115.2 |
| ENSDARE00000664100 | 228 | 41.5 | 186.5 |
| ENSDARE00000664110 | 147 | 32.5 | 114.5 |
| ENSDARE00000664146 | 219 | 56.6 | 162.4 |
| ENSDARE00000664175 | 186 | 44.6 | 141.4 |
| ENSDARE00000664222 | 165 | 49.2 | 115.8 |
| ENSDARE00000664236 | 147 | 37.9 | 109.1 |
| ENSDARE00000668704 | 234 | 36.3 | 197.7 |
| ENSDARE00000668740 | 291 | 64.8 | 226.2 |
| ENSDARE00000668775 | 138 | 31.7 | 106.3 |
| ENSDARE00000668799 | 195 | 36.8 | 158.2 |
| ENSDARE00000668808 | 198 | 32.7 | 165.3 |
| ENSDARE00000668820 | 150 | 32.4 | 117.6 |
| ENSDARE00000668824 | 312 | 57.4 | 254.6 |
| ENSDARE00000671990 | 180 | 33.9 | 146.1 |
| ENSDARE00000672014 | 156 | 28.9 | 127.1 |
| ENSDARE00000672050 | 180 | 30.3 | 149.7 |
| ENSDARE00000672077 | 207 | 38.7 | 168.3 |
| ENSDARE00000672096 | 156 | 30.7 | 125.3 |
| ENSDARE00000672104 | 282 | 59.3 | 222.7 |



|                    |     |      |       |
|--------------------|-----|------|-------|
| ENSDARE00000672124 | 198 | 30   | 168   |
| ENSDARE00000672158 | 189 | 36.3 | 152.7 |
| ENSDARE00000672176 | 210 | 43.1 | 166.9 |
| ENSDARE00000672238 | 198 | 48.2 | 149.8 |
| ENSDARE00000672265 | 180 | 44.9 | 135.1 |
| ENSDARE00000672358 | 156 | 40.3 | 115.7 |
| ENSDARE00000673691 | 177 | 43.4 | 133.6 |
| ENSDARE00000673739 | 159 | 38.3 | 120.7 |
| ENSDARE00000673792 | 186 | 31.4 | 154.6 |
| ENSDARE00000677593 | 132 | 24.9 | 107.1 |
| ENSDARE00000677597 | 312 | 69.6 | 242.4 |
| ENSDARE00000678787 | 210 | 35.7 | 174.3 |
| ENSDARE00000681411 | 195 | 52.6 | 142.4 |
| ENSDARE00000681420 | 174 | 35.3 | 138.7 |
| ENSDARE00000681437 | 243 | 49.8 | 193.2 |
| ENSDARE00000681450 | 207 | 36.2 | 170.8 |
| ENSDARE00000681468 | 177 | 30.7 | 146.3 |
| ENSDARE00000681475 | 177 | 37.6 | 139.4 |
| ENSDARE00000682848 | 198 | 45   | 153   |
| ENSDARE00000682853 | 141 | 27.5 | 113.5 |
| ENSDARE00000684137 | 204 | 38.5 | 165.5 |
| ENSDARE00000684157 | 189 | 45.2 | 143.8 |
| ENSDARE00000684190 | 195 | 39.3 | 155.7 |
| ENSDARE00000684194 | 294 | 58   | 236   |
| ENSDARE00000684201 | 162 | 34.5 | 127.5 |
| ENSDARE00000684203 | 123 | 28.1 | 94.9  |
| ENSDARE00000684230 | 135 | 29.1 | 105.9 |
| ENSDARE00000684271 | 195 | 36.8 | 158.2 |
| ENSDARE00000691606 | 147 | 36.6 | 110.4 |
| ENSDARE00000693112 | 189 | 32.3 | 156.7 |
| ENSDARE00000693114 | 159 | 36.2 | 122.8 |
| ENSDARE00000693116 | 159 | 39.8 | 119.2 |
| ENSDARE00000693117 | 162 | 46   | 116   |
| ENSDARE00000693118 | 216 | 53.7 | 162.3 |
| ENSDARE00000693126 | 174 | 34.3 | 139.7 |
| ENSDARE00000693189 | 165 | 47.5 | 117.5 |
| ENSDARE00000693190 | 183 | 39.4 | 143.6 |
| ENSDARE00000693191 | 192 | 37.3 | 154.7 |
| ENSDARE00000693487 | 186 | 38.9 | 147.1 |
| ENSDARE00000693534 | 216 | 62.1 | 153.9 |
| ENSDARE00000693537 | 273 | 47.5 | 225.5 |
| ENSDARE00000693539 | 240 | 49   | 191   |

|                    |     |      |       |
|--------------------|-----|------|-------|
| ENSDARE00000693579 | 195 | 47.2 | 147.8 |
| ENSDARE00000694221 | 150 | 42.7 | 107.3 |
| ENSDARE00000694225 | 162 | 30.6 | 131.4 |
| ENSDARE00000694226 | 153 | 36.6 | 116.4 |
| ENSDARE00000695869 | 240 | 48.8 | 191.2 |
| ENSDARE00000699851 | 183 | 35.8 | 147.2 |
| ENSDARE00000699853 | 171 | 29   | 142   |
| ENSDARE00000699855 | 243 | 55.9 | 187.1 |
| ENSDARE00000699857 | 186 | 37.4 | 148.6 |
| ENSDARE00000702602 | 198 | 42.5 | 155.5 |
| ENSDARE00000702612 | 156 | 39.7 | 116.3 |
| ENSDARE00000702616 | 150 | 37.9 | 112.1 |
| ENSDARE00000702631 | 135 | 35.4 | 99.6  |
| ENSDARE00000704083 | 294 | 58.7 | 235.3 |
| ENSDARE00000705628 | 207 | 52.8 | 154.2 |
| ENSDARE00000705635 | 189 | 44.7 | 144.3 |
| ENSDARE00000706012 | 165 | 39.9 | 125.1 |
| ENSDARE00000706014 | 144 | 26.2 | 117.8 |
| ENSDARE00000706606 | 174 | 48.5 | 125.5 |
| ENSDARE00000706620 | 156 | 30.5 | 125.5 |
| ENSDARE00000711507 | 174 | 25.8 | 148.2 |
| ENSDARE00000711512 | 159 | 26.2 | 132.8 |
| ENSDARE00000711514 | 162 | 34.6 | 127.4 |
| ENSDARE00000712064 | 216 | 48.4 | 167.6 |
| ENSDARE00000712066 | 219 | 47.9 | 171.1 |
| ENSDARE00000712069 | 168 | 36.1 | 131.9 |
| ENSDARE00000712090 | 213 | 45   | 168   |
| ENSDARE00000712092 | 192 | 50.2 | 141.8 |
| ENSDARE00000712106 | 210 | 44.1 | 165.9 |
| ENSDARE00000712110 | 195 | 43.4 | 151.6 |
| ENSDARE00000712115 | 153 | 22.8 | 130.2 |
| ENSDARE00000712140 | 213 | 42   | 171   |
| ENSDARE00000715295 | 180 | 32.6 | 147.4 |
| ENSDARE00000715309 | 159 | 24.5 | 134.5 |
| ENSDARE00000715313 | 183 | 29.7 | 153.3 |
| ENSDARE00000715325 | 141 | 37.2 | 103.8 |
| ENSDARE00000715607 | 153 | 37.4 | 115.6 |
| ENSDARE00000715611 | 231 | 55.3 | 175.7 |
| ENSDARE00000715621 | 171 | 40.7 | 130.3 |
| ENSDARE00000715666 | 303 | 76.9 | 226.1 |
| ENSDARE00000715680 | 159 | 31.2 | 127.8 |
| ENSDARE00000715695 | 240 | 46.8 | 193.2 |

|                    |     |       |       |
|--------------------|-----|-------|-------|
| ENSDARE00000715950 | 228 | 54.5  | 173.5 |
| ENSDARE00000715999 | 198 | 46.7  | 151.3 |
| ENSDARE00000716007 | 162 | 32.1  | 129.9 |
| ENSDARE00000716028 | 177 | 33    | 144   |
| ENSDARE00000716057 | 213 | 44.8  | 168.2 |
| ENSDARE00000716065 | 171 | 43    | 128   |
| ENSDARE00000716795 | 201 | 34.3  | 166.7 |
| ENSDARE00000716814 | 237 | 43.1  | 193.9 |
| ENSDARE00000716819 | 192 | 38    | 154   |
| ENSDARE00000716823 | 174 | 34.4  | 139.6 |
| ENSDARE00000716830 | 237 | 38.5  | 198.5 |
| ENSDARE00000716832 | 189 | 26.2  | 162.8 |
| ENSDARE00000716836 | 159 | 33.5  | 125.5 |
| ENSDARE00000716845 | 168 | 29.4  | 138.6 |
| ENSDARE00000716855 | 177 | 31.9  | 145.1 |
| ENSDARE00000716860 | 246 | 52.6  | 193.4 |
| ENSDARE00000716869 | 210 | 33.2  | 176.8 |
| ENSDARE00000716881 | 237 | 37.7  | 199.3 |
| ENSDARE00000716885 | 186 | 30.8  | 155.2 |
| ENSDARE00000716889 | 192 | 38.9  | 153.1 |
| ENSDARE00000716898 | 162 | 31.8  | 130.2 |
| ENSDARE00000716903 | 207 | 34.4  | 172.6 |
| ENSDARE00000716906 | 195 | 30.9  | 164.1 |
| ENSDARE00000717004 | 126 | 25    | 101   |
| ENSDARE00000717015 | 207 | 54.2  | 152.8 |
| ENSDARE00000717029 | 156 | 28.8  | 127.2 |
| ENSDARE00000717035 | 189 | 46.1  | 142.9 |
| ENSDARE00000717064 | 162 | 33.2  | 128.8 |
| ENSDARE00000717073 | 150 | 26.7  | 123.3 |
| ENSDARE00000717083 | 162 | 30.4  | 131.6 |
| ENSDARE00000717094 | 225 | 43.8  | 181.2 |
| ENSDARE00000717100 | 264 | 57.3  | 206.7 |
| ENSDARE00000719716 | 525 | 122.9 | 402.1 |
| ENSDARE00000719726 | 177 | 41.5  | 135.5 |
| ENSDARE00000719729 | 168 | 42.8  | 125.2 |
| ENSDARE00000719733 | 201 | 51.8  | 149.2 |
| ENSDARE00000719735 | 153 | 45.3  | 107.7 |
| ENSDARE00000719739 | 165 | 44.4  | 120.6 |
| ENSDARE00000720776 | 183 | 52.7  | 130.3 |
| ENSDARE00000730549 | 156 | 41.5  | 114.5 |
| ENSDARE00000730555 | 150 | 36.3  | 113.7 |
| ENSDARE00000730558 | 141 | 42.7  | 98.3  |

|                    |     |      |       |
|--------------------|-----|------|-------|
| ENSDARE00000731457 | 213 | 24.5 | 188.5 |
| ENSDARE00000732826 | 147 | 41.9 | 105.1 |
| ENSDARE00000732832 | 153 | 36.4 | 116.6 |
| ENSDARE00000732856 | 153 | 37.9 | 115.1 |
| ENSDARE00000732860 | 138 | 34.5 | 103.5 |
| ENSDARE00000735714 | 228 | 37.8 | 190.2 |
| ENSDARE00000735719 | 162 | 28.5 | 133.5 |
| ENSDARE00000737068 | 135 | 24   | 111   |
| ENSDARE00000737103 | 141 | 36.7 | 104.3 |
| ENSDARE00000737111 | 180 | 33.8 | 146.2 |
| ENSDARE00000738962 | 150 | 33.2 | 116.8 |
| ENSDARE00000738964 | 174 | 33.1 | 140.9 |
| ENSDARE00000739397 | 186 | 44.4 | 141.6 |
| ENSDARE00000740292 | 144 | 30.8 | 113.2 |
| ENSDARE00000740294 | 180 | 48.5 | 131.5 |
| ENSDARE00000740298 | 165 | 46.3 | 118.7 |
| ENSDARE00000740565 | 162 | 35.1 | 126.9 |
| ENSDARE00000743432 | 153 | 30.2 | 122.8 |
| ENSDARE00000743763 | 132 | 28.6 | 103.4 |
| ENSDARE00000743890 | 168 | 34.4 | 133.6 |
| ENSDARE00000746292 | 168 | 35.6 | 132.4 |
| ENSDARE00000746911 | 198 | 61.8 | 136.2 |
| ENSDARE00000748012 | 243 | 49.3 | 193.7 |
| ENSDARE00000749025 | 171 | 39.5 | 131.5 |
| ENSDARE00000749316 | 150 | 26   | 124   |
| ENSDARE00000749374 | 255 | 48.8 | 206.2 |
| ENSDARE00000752332 | 141 | 32.4 | 108.6 |
| ENSDARE00000754356 | 174 | 29.8 | 144.2 |
| ENSDARE00000754365 | 174 | 34   | 140   |
| ENSDARE00000754384 | 192 | 42.8 | 149.2 |
| ENSDARE00000754398 | 165 | 35.8 | 129.2 |
| ENSDARE00000754411 | 156 | 36.3 | 119.7 |
| ENSDARE00000755277 | 192 | 32.1 | 159.9 |
| ENSDARE00000757353 | 153 | 41.5 | 111.5 |
| ENSDARE00000757369 | 180 | 34.3 | 145.7 |
| ENSDARE00000757376 | 162 | 35   | 127   |
| ENSDARE00000757379 | 174 | 35.4 | 138.6 |
| ENSDARE00000757381 | 198 | 38.2 | 159.8 |
| ENSDARE00000759869 | 189 | 46   | 143   |
| ENSDARE00000759895 | 345 | 91.2 | 253.8 |
| ENSDARE00000759901 | 150 | 41.8 | 108.2 |
| ENSDARE00000759904 | 126 | 21.5 | 104.5 |

|                    |     |      |       |
|--------------------|-----|------|-------|
| ENSDARE00000759916 | 153 | 32.9 | 120.1 |
| ENSDARE00000766250 | 183 | 15.4 | 167.6 |
| ENSDARE00000766253 | 144 | 15.3 | 128.7 |
| ENSDARE00000766261 | 150 | 21.7 | 128.3 |
| ENSDARE00000766670 | 165 | 30.3 | 134.7 |
| ENSDARE00000766673 | 192 | 25.1 | 166.9 |
| ENSDARE00000766676 | 252 | 48.6 | 203.4 |
| ENSDARE00000770662 | 141 | 28.5 | 112.5 |
| ENSDARE00000770664 | 213 | 47.1 | 165.9 |
| ENSDARE00000771170 | 171 | 29.6 | 141.4 |
| ENSDARE00000774381 | 129 | 30   | 99    |
| ENSDARE00000774389 | 159 | 29.9 | 129.1 |
| ENSDARE00000774395 | 192 | 27.9 | 164.1 |
| ENSDARE00000775044 | 183 | 47.9 | 135.1 |
| ENSDARE00000775302 | 324 | 54.6 | 269.4 |
| ENSDARE00000775343 | 171 | 38.7 | 132.3 |
| ENSDARE00000776025 | 195 | 52.1 | 142.9 |
| ENSDARE00000776079 | 150 | 32.5 | 117.5 |
| ENSDARE00000776742 | 189 | 49.9 | 139.1 |
| ENSDARE00000776757 | 270 | 57.1 | 212.9 |
| ENSDARE00000776784 | 150 | 41   | 109   |
| ENSDARE00000777124 | 195 | 26.6 | 168.4 |
| ENSDARE00000777574 | 198 | 34.3 | 163.7 |
| ENSDARE00000777995 | 168 | 38.8 | 129.2 |
| ENSDARE00000778247 | 225 | 51.8 | 173.2 |
| ENSDARE00000778745 | 171 | 26.8 | 144.2 |
| ENSDARE00000779188 | 153 | 23.2 | 129.8 |
| ENSDARE00000779190 | 192 | 48.1 | 143.9 |
| ENSDARE00000779264 | 156 | 47.4 | 108.6 |
| ENSDARE00000779325 | 195 | 30.4 | 164.6 |
| ENSDARE00000780128 | 156 | 41.9 | 114.1 |
| ENSDARE00000780253 | 159 | 25.6 | 133.4 |
| ENSDARE00000780432 | 252 | 51.2 | 200.8 |
| ENSDARE00000781234 | 153 | 32.6 | 120.4 |
| ENSDARE00000781662 | 171 | 48.4 | 122.6 |
| ENSDARE00000782197 | 156 | 48.2 | 107.8 |
| ENSDARE00000782271 | 216 | 35.6 | 180.4 |
| ENSDARE00000782334 | 234 | 40.6 | 193.4 |
| ENSDARE00000783156 | 261 | 57.3 | 203.7 |
| ENSDARE00000783245 | 171 | 40.5 | 130.5 |
| ENSDARE00000783283 | 174 | 35   | 139   |
| ENSDARE00000783339 | 168 | 49.6 | 118.4 |

|                    |     |       |       |
|--------------------|-----|-------|-------|
| ENSDARE00000783733 | 156 | 38    | 118   |
| ENSDARE00000783887 | 189 | 43.8  | 145.2 |
| ENSDARE00000783991 | 168 | 45.2  | 122.8 |
| ENSDARE00000784313 | 174 | 38.5  | 135.5 |
| ENSDARE00000784351 | 150 | 35.3  | 114.7 |
| ENSDARE00000785293 | 237 | 47.3  | 189.7 |
| ENSDARE00000785412 | 171 | 36.8  | 134.2 |
| ENSDARE00000786247 | 129 | 31.3  | 97.7  |
| ENSDARE00000786297 | 270 | 52.2  | 217.8 |
| ENSDARE00000786354 | 150 | 42.8  | 107.2 |
| ENSDARE00000786445 | 159 | 50.2  | 108.8 |
| ENSDARE00000786818 | 219 | 43.6  | 175.4 |
| ENSDARE00000787103 | 198 | 51.7  | 146.3 |
| ENSDARE00000787936 | 174 | 40.5  | 133.5 |
| ENSDARE00000788204 | 153 | 44.5  | 108.5 |
| ENSDARE00000788234 | 162 | 41.5  | 120.5 |
| ENSDARE00000788394 | 258 | 41.8  | 216.2 |
| ENSDARE00000788729 | 150 | 31.8  | 118.2 |
| ENSDARE00000788991 | 180 | 54.9  | 125.1 |
| ENSDARE00000789125 | 177 | 31.5  | 145.5 |
| ENSDARE00000789215 | 138 | 41.5  | 96.5  |
| ENSDARE00000789433 | 150 | 37.2  | 112.8 |
| ENSDARE00000789684 | 153 | 25.5  | 127.5 |
| ENSDARE00000789813 | 339 | 64.5  | 274.5 |
| ENSDARE00000790100 | 285 | 63.2  | 221.8 |
| ENSDARE00000790288 | 156 | 36.6  | 119.4 |
| ENSDARE00000790691 | 234 | 53.2  | 180.8 |
| ENSDARE00000790753 | 150 | 29.6  | 120.4 |
| ENSDARE00000790887 | 216 | 49.5  | 166.5 |
| ENSDARE00000790894 | 180 | 46.2  | 133.8 |
| ENSDARE00000790909 | 228 | 45.2  | 182.8 |
| ENSDARE00000790941 | 198 | 55.2  | 142.8 |
| ENSDARE00000791415 | 198 | 36.1  | 161.9 |
| ENSDARE00000791494 | 156 | 32.4  | 123.6 |
| ENSDARE00000792274 | 204 | 41.2  | 162.8 |
| ENSDARE00000792391 | 192 | 29.4  | 162.6 |
| ENSDARE00000793059 | 564 | 148.3 | 415.7 |
| ENSDARE00000793791 | 132 | 39.5  | 92.5  |
| ENSDARE00000793870 | 213 | 49.9  | 163.1 |
| ENSDARE00000794204 | 162 | 43.7  | 118.3 |
| ENSDARE00000794426 | 246 | 46    | 200   |
| ENSDARE00000794764 | 234 | 35.2  | 198.8 |

|                    |     |       |       |
|--------------------|-----|-------|-------|
| ENSDARE00000794970 | 159 | 34.6  | 124.4 |
| ENSDARE00000795003 | 177 | 32.1  | 144.9 |
| ENSDARE00000795290 | 168 | 36.2  | 131.8 |
| ENSDARE00000795518 | 324 | 63.4  | 260.6 |
| ENSDARE00000795619 | 180 | 40.7  | 139.3 |
| ENSDARE00000795670 | 357 | 56.8  | 300.2 |
| ENSDARE00000795729 | 216 | 48.5  | 167.5 |
| ENSDARE00000795894 | 168 | 29.3  | 138.7 |
| ENSDARE00000796087 | 270 | 64.3  | 205.7 |
| ENSDARE00000796579 | 147 | 40.9  | 106.1 |
| ENSDARE00000796678 | 204 | 50.3  | 153.7 |
| ENSDARE00000796727 | 159 | 33.1  | 125.9 |
| ENSDARE00000796817 | 537 | 162.5 | 374.5 |
| ENSDARE00000796879 | 168 | 47.8  | 120.2 |
| ENSDARE00000797212 | 150 | 26.5  | 123.5 |
| ENSDARE00000797397 | 150 | 28.4  | 121.6 |
| ENSDARE00000797539 | 201 | 37.7  | 163.3 |
| ENSDARE00000797540 | 195 | 46.5  | 148.5 |
| ENSDARE00000797568 | 183 | 51.4  | 131.6 |
| ENSDARE00000797652 | 147 | 38.1  | 108.9 |
| ENSDARE00000797905 | 147 | 36.2  | 110.8 |
| ENSDARE00000797998 | 159 | 39.2  | 119.8 |
| ENSDARE00000798810 | 150 | 31.7  | 118.3 |
| ENSDARE00000798877 | 330 | 68.7  | 261.3 |
| ENSDARE00000798886 | 138 | 27.8  | 110.2 |
| ENSDARE00000799022 | 201 | 51.1  | 149.9 |
| ENSDARE00000799093 | 168 | 30.6  | 137.4 |
| ENSDARE00000799161 | 360 | 56.3  | 303.7 |
| ENSDARE00000799450 | 183 | 38.1  | 144.9 |
| ENSDARE00000799533 | 207 | 31.6  | 175.4 |
| ENSDARE00000799619 | 147 | 42    | 105   |
| ENSDARE00000800033 | 192 | 53.9  | 138.1 |
| ENSDARE00000800164 | 228 | 56.7  | 171.3 |
| ENSDARE00000800803 | 150 | 30.5  | 119.5 |
| ENSDARE00000801111 | 144 | 35.6  | 108.4 |
| ENSDARE00000801351 | 183 | 20    | 163   |
| ENSDARE00000801486 | 309 | 76.8  | 232.2 |
| ENSDARE00000801740 | 477 | 118   | 359   |
| ENSDARE00000801914 | 180 | 42.1  | 137.9 |
| ENSDARE00000802196 | 174 | 35.7  | 138.3 |
| ENSDARE00000802337 | 135 | 32.8  | 102.2 |
| ENSDARE00000802354 | 204 | 57.9  | 146.1 |

|                    |     |      |       |
|--------------------|-----|------|-------|
| ENSDARE00000802418 | 183 | 48.5 | 134.5 |
| ENSDARE00000802698 | 162 | 31.3 | 130.7 |
| ENSDARE00000802781 | 198 | 43   | 155   |
| ENSDARE00000803684 | 129 | 21.7 | 107.3 |
| ENSDARE00000804051 | 288 | 71.9 | 216.1 |
| ENSDARE00000804578 | 150 | 35.7 | 114.3 |
| ENSDARE00000804672 | 156 | 24.3 | 131.7 |
| ENSDARE00000804979 | 180 | 29.3 | 150.7 |
| ENSDARE00000805045 | 171 | 31.6 | 139.4 |
| ENSDARE00000805489 | 180 | 41.4 | 138.6 |
| ENSDARE00000805632 | 243 | 48.6 | 194.4 |
| ENSDARE00000805901 | 153 | 42.3 | 110.7 |
| ENSDARE00000806090 | 144 | 35.1 | 108.9 |
| ENSDARE00000806132 | 336 | 77.5 | 258.5 |
| ENSDARE00000806191 | 144 | 38.9 | 105.1 |
| ENSDARE00000806262 | 156 | 38.7 | 117.3 |
| ENSDARE00000806445 | 171 | 48.9 | 122.1 |
| ENSDARE00000806639 | 171 | 52.9 | 118.1 |
| ENSDARE00000806729 | 180 | 37   | 143   |
| ENSDARE00000806786 | 246 | 60.3 | 185.7 |
| ENSDARE00000806900 | 177 | 51.1 | 125.9 |
| ENSDARE00000807355 | 174 | 28   | 146   |
| ENSDARE00000808052 | 159 | 38   | 121   |
| ENSDARE00000808083 | 189 | 35.6 | 153.4 |
| ENSDARE00000808131 | 198 | 58.4 | 139.6 |
| ENSDARE00000808293 | 204 | 50.1 | 153.9 |
| ENSDARE00000808308 | 195 | 36.6 | 158.4 |
| ENSDARE00000808437 | 159 | 27.8 | 131.2 |
| ENSDARE00000808746 | 144 | 48.1 | 95.9  |
| ENSDARE00000808785 | 171 | 46.8 | 124.2 |
| ENSDARE00000809134 | 198 | 54.6 | 143.4 |
| ENSDARE00000809206 | 177 | 34.1 | 142.9 |
| ENSDARE00000809352 | 144 | 39.6 | 104.4 |
| ENSDARE00000809627 | 147 | 39.7 | 107.3 |
| ENSDARE00000809914 | 144 | 34.5 | 109.5 |
| ENSDARE00000810378 | 258 | 62.7 | 195.3 |
| ENSDARE00000810518 | 147 | 28.4 | 118.6 |
| ENSDARE00000810811 | 123 | 23.5 | 99.5  |
| ENSDARE00000811634 | 150 | 33.5 | 116.5 |
| ENSDARE00000811811 | 153 | 41.4 | 111.6 |
| ENSDARE00000812117 | 174 | 30.3 | 143.7 |
| ENSDARE00000812281 | 180 | 34.7 | 145.3 |



|                    |     |       |       |
|--------------------|-----|-------|-------|
| ENSDARE00000812370 | 156 | 17.5  | 138.5 |
| ENSDARE00000812534 | 246 | 58.3  | 187.7 |
| ENSDARE00000812760 | 222 | 54.7  | 167.3 |
| ENSDARE00000812780 | 141 | 36.7  | 104.3 |
| ENSDARE00000812856 | 174 | 36    | 138   |
| ENSDARE00000813076 | 147 | 29.3  | 117.7 |
| ENSDARE00000813166 | 150 | 30.2  | 119.8 |
| ENSDARE00000813375 | 171 | 31.4  | 139.6 |
| ENSDARE00000813397 | 153 | 24    | 129   |
| ENSDARE00000813405 | 150 | 31.1  | 118.9 |
| ENSDARE00000813435 | 156 | 35.5  | 120.5 |
| ENSDARE00000813751 | 159 | 37.6  | 121.4 |
| ENSDARE00000813952 | 186 | 52.3  | 133.7 |
| ENSDARE00000814296 | 510 | 109.4 | 400.6 |
| ENSDARE00000814841 | 228 | 44.6  | 183.4 |
| ENSDARE00000814924 | 231 | 62.9  | 168.1 |
| ENSDARE00000815243 | 195 | 44.3  | 150.7 |
| ENSDARE00000815542 | 198 | 46.3  | 151.7 |
| ENSDARE00000815924 | 177 | 45.5  | 131.5 |
| ENSDARE00000816220 | 165 | 36.6  | 128.4 |
| ENSDARE00000816539 | 228 | 43.9  | 184.1 |
| ENSDARE00000816576 | 174 | 52.6  | 121.4 |
| ENSDARE00000816831 | 171 | 43    | 128   |
| ENSDARE00000817156 | 228 | 55    | 173   |
| ENSDARE00000817380 | 228 | 47.6  | 180.4 |
| ENSDARE00000817560 | 132 | 34.2  | 97.8  |
| ENSDARE00000817618 | 144 | 27.2  | 116.8 |
| ENSDARE00000817775 | 150 | 37    | 113   |
| ENSDARE00000817963 | 213 | 27.4  | 185.6 |
| ENSDARE00000818012 | 198 | 30.9  | 167.1 |
| ENSDARE00000818079 | 183 | 54.7  | 128.3 |
| ENSDARE00000818317 | 162 | 37.3  | 124.7 |
| ENSDARE00000818682 | 156 | 38.5  | 117.5 |
| ENSDARE00000818811 | 216 | 38.6  | 177.4 |
| ENSDARE00000818964 | 189 | 47.9  | 141.1 |
| ENSDARE00000819039 | 150 | 35    | 115   |
| ENSDARE00000819046 | 261 | 67.3  | 193.7 |
| ENSDARE00000819503 | 198 | 41.9  | 156.1 |
| ENSDARE00000820232 | 147 | 34.7  | 112.3 |
| ENSDARE00000820409 | 159 | 31.3  | 127.7 |
| ENSDARE00000820615 | 156 | 25.7  | 130.3 |
| ENSDARE00000820768 | 144 | 21.2  | 122.8 |

|                    |     |       |       |
|--------------------|-----|-------|-------|
| ENSDARE00000821274 | 609 | 145.7 | 463.3 |
| ENSDARE00000821277 | 171 | 40    | 131   |
| ENSDARE00000821346 | 150 | 34.5  | 115.5 |
| ENSDARE00000821408 | 168 | 42.8  | 125.2 |
| ENSDARE00000821541 | 237 | 68.2  | 168.8 |
| ENSDARE00000821542 | 174 | 51.1  | 122.9 |
| ENSDARE00000821850 | 159 | 23.4  | 135.6 |
| ENSDARE00000821992 | 201 | 39.2  | 161.8 |
| ENSDARE00000822056 | 192 | 39.2  | 152.8 |
| ENSDARE00000822343 | 135 | 31.8  | 103.2 |
| ENSDARE00000822533 | 156 | 36.4  | 119.6 |
| ENSDARE00000822563 | 345 | 92.5  | 252.5 |
| ENSDARE00000822637 | 216 | 56    | 160   |
| ENSDARE00000822690 | 162 | 37.6  | 124.4 |
| ENSDARE00000822883 | 168 | 42.2  | 125.8 |
| ENSDARE00000822927 | 153 | 44.2  | 108.8 |
| ENSDARE00000823099 | 252 | 63.5  | 188.5 |
| ENSDARE00000823750 | 162 | 44.4  | 117.6 |
| ENSDARE00000824062 | 150 | 33.7  | 116.3 |
| ENSDARE00000824363 | 165 | 29    | 136   |
| ENSDARE00000824642 | 168 | 36.4  | 131.6 |
| ENSDARE00000824763 | 135 | 35.6  | 99.4  |
| ENSDARE00000825015 | 210 | 47.2  | 162.8 |
| ENSDARE00000825408 | 156 | 46.1  | 109.9 |
| ENSDARE00000825507 | 231 | 48.3  | 182.7 |
| ENSDARE00000825658 | 192 | 42.8  | 149.2 |
| ENSDARE00000825799 | 159 | 40    | 119   |
| ENSDARE00000826290 | 225 | 37.9  | 187.1 |
| ENSDARE00000826493 | 174 | 45.1  | 128.9 |
| ENSDARE00000826580 | 141 | 30.9  | 110.1 |
| ENSDARE00000826893 | 138 | 31.2  | 106.8 |
| ENSDARE00000826960 | 195 | 34    | 161   |
| ENSDARE00000827161 | 288 | 74    | 214   |
| ENSDARE00000827566 | 177 | 37.6  | 139.4 |
| ENSDARE00000827579 | 213 | 57    | 156   |
| ENSDARE00000827655 | 510 | 128.8 | 381.2 |
| ENSDARE00000827926 | 186 | 41.2  | 144.8 |
| ENSDARE00000828340 | 183 | 32.3  | 150.7 |
| ENSDARE00000828481 | 183 | 53.8  | 129.2 |
| ENSDARE00000828610 | 168 | 43    | 125   |
| ENSDARE00000828878 | 141 | 23.7  | 117.3 |
| ENSDARE00000829041 | 165 | 43.3  | 121.7 |

|                    |      |       |        |
|--------------------|------|-------|--------|
| ENSDARE00000829341 | 138  | 38.7  | 99.3   |
| ENSDARE00000830024 | 165  | 41.7  | 123.3  |
| ENSDARE00000830343 | 180  | 43.2  | 136.8  |
| ENSDARE00000830633 | 135  | 26.6  | 108.4  |
| ENSDARE00000830916 | 198  | 49.8  | 148.2  |
| ENSDARE00000831109 | 174  | 29.2  | 144.8  |
| ENSDARE00000831113 | 177  | 32.1  | 144.9  |
| ENSDARE00000831393 | 171  | 37.5  | 133.5  |
| ENSDARE00000831838 | 201  | 49.1  | 151.9  |
| ENSDARE00000832329 | 150  | 40.8  | 109.2  |
| ENSDARE00000832789 | 1764 | 443.5 | 1320.5 |
| ENSDARE00000833160 | 159  | 33.5  | 125.5  |
| ENSDARE00000833305 | 264  | 62.9  | 201.1  |
| ENSDARE00000833482 | 285  | 75.5  | 209.5  |
| ENSDARE00000833793 | 294  | 80.8  | 213.2  |
| ENSDARE00000833856 | 171  | 36.6  | 134.4  |
| ENSDARE00000834049 | 156  | 46.9  | 109.1  |
| ENSDARE00000834980 | 159  | 34.5  | 124.5  |
| ENSDARE00000835905 | 159  | 35.2  | 123.8  |
| ENSDARE00000836502 | 159  | 36.6  | 122.4  |
| ENSDARE00000836834 | 252  | 68.8  | 183.2  |
| ENSDARE00000836989 | 126  | 25.5  | 100.5  |
| ENSDARE00000837186 | 174  | 42.4  | 131.6  |
| ENSDARE00000837294 | 153  | 34.7  | 118.3  |
| ENSDARE00000837639 | 171  | 46.5  | 124.5  |
| ENSDARE00000838127 | 156  | 33.3  | 122.7  |
| ENSDARE00000838329 | 189  | 42.2  | 146.8  |
| ENSDARE00000838514 | 183  | 44.4  | 138.6  |
| ENSDARE00000838794 | 204  | 54.2  | 149.8  |
| ENSDARE00000838840 | 150  | 27.7  | 122.3  |
| ENSDARE00000839011 | 162  | 26.6  | 135.4  |
| ENSDARE00000839037 | 192  | 50.5  | 141.5  |
| ENSDARE00000839081 | 177  | 27.5  | 149.5  |
| ENSDARE00000839200 | 174  | 42.6  | 131.4  |
| ENSDARE00000839263 | 147  | 38.1  | 108.9  |
| ENSDARE00000839417 | 186  | 58.1  | 127.9  |
| ENSDARE00000839475 | 228  | 56.3  | 171.7  |
| ENSDARE00000839612 | 165  | 35    | 130    |
| ENSDARE00000840333 | 159  | 55.9  | 103.1  |
| ENSDARE00000840463 | 192  | 43.4  | 148.6  |
| ENSDARE00000840477 | 159  | 40.8  | 118.2  |
| ENSDARE00000841054 | 174  | 26.4  | 147.6  |

|                    |     |       |       |
|--------------------|-----|-------|-------|
| ENSDARE00000841136 | 195 | 48.4  | 146.6 |
| ENSDARE00000841382 | 162 | 33    | 129   |
| ENSDARE00000842080 | 159 | 41.7  | 117.3 |
| ENSDARE00000842341 | 201 | 42    | 159   |
| ENSDARE00000842702 | 162 | 55.6  | 106.4 |
| ENSDARE00000842720 | 171 | 42.1  | 128.9 |
| ENSDARE00000842722 | 153 | 46.1  | 106.9 |
| ENSDARE00000842730 | 303 | 73.8  | 229.2 |
| ENSDARE00000842970 | 213 | 62.6  | 150.4 |
| ENSDARE00000843086 | 168 | 49.5  | 118.5 |
| ENSDARE00000843309 | 135 | 30    | 105   |
| ENSDARE00000843334 | 186 | 43.7  | 142.3 |
| ENSDARE00000843492 | 666 | 166.1 | 499.9 |
| ENSDARE00000843570 | 231 | 53.5  | 177.5 |
| ENSDARE00000843714 | 174 | 35.4  | 138.6 |
| ENSDARE00000843730 | 159 | 42    | 117   |
| ENSDARE00000843812 | 228 | 46.8  | 181.2 |
| ENSDARE00000843862 | 153 | 33.3  | 119.7 |
| ENSDARE00000844002 | 189 | 32.9  | 156.1 |
| ENSDARE00000844853 | 168 | 41.9  | 126.1 |
| ENSDARE00000844876 | 363 | 109.7 | 253.3 |
| ENSDARE00000845490 | 171 | 50.9  | 120.1 |
| ENSDARE00000845596 | 147 | 33.5  | 113.5 |
| ENSDARE00000845643 | 654 | 149.2 | 504.8 |
| ENSDARE00000845764 | 147 | 31.9  | 115.1 |
| ENSDARE00000845869 | 153 | 34.2  | 118.8 |
| ENSDARE00000846016 | 660 | 176   | 484   |
| ENSDARE00000846736 | 171 | 45.3  | 125.7 |
| ENSDARE00000846776 | 168 | 28.2  | 139.8 |
| ENSDARE00000847055 | 243 | 61.8  | 181.2 |
| ENSDARE00000847084 | 168 | 42.3  | 125.7 |
| ENSDARE00000847133 | 195 | 47.6  | 147.4 |
| ENSDARE00000847255 | 222 | 40.9  | 181.1 |
| ENSDARE00000848369 | 159 | 23.1  | 135.9 |
| ENSDARE00000848654 | 207 | 42.7  | 164.3 |
| ENSDARE00000848672 | 222 | 58.2  | 163.8 |
| ENSDARE00000848699 | 192 | 24.9  | 167.1 |
| ENSDARE00000848979 | 156 | 27.1  | 128.9 |
| ENSDARE00000848998 | 177 | 41.8  | 135.2 |
| ENSDARE00000849074 | 177 | 35.5  | 141.5 |
| ENSDARE00000849207 | 183 | 37.3  | 145.7 |
| ENSDARE00000849427 | 207 | 44.8  | 162.2 |

|                    |     |       |       |
|--------------------|-----|-------|-------|
| ENSDARE00000849593 | 150 | 36.9  | 113.1 |
| ENSDARE00000849955 | 141 | 41    | 100   |
| ENSDARE00000849972 | 156 | 38.1  | 117.9 |
| ENSDARE00000849977 | 189 | 48.6  | 140.4 |
| ENSDARE00000850269 | 189 | 47.9  | 141.1 |
| ENSDARE00000850929 | 180 | 35    | 145   |
| ENSDARE00000851126 | 123 | 37.9  | 85.1  |
| ENSDARE00000851128 | 162 | 28.6  | 133.4 |
| ENSDARE00000851512 | 183 | 45.7  | 137.3 |
| ENSDARE00000851539 | 165 | 42.1  | 122.9 |
| ENSDARE00000851682 | 153 | 34.6  | 118.4 |
| ENSDARE00000851696 | 165 | 33.3  | 131.7 |
| ENSDARE00000852106 | 162 | 21.2  | 140.8 |
| ENSDARE00000852266 | 219 | 49.2  | 169.8 |
| ENSDARE00000852603 | 144 | 33.4  | 110.6 |
| ENSDARE00000852878 | 234 | 53    | 181   |
| ENSDARE00000853503 | 129 | 21.1  | 107.9 |
| ENSDARE00000854059 | 186 | 34    | 152   |
| ENSDARE00000854326 | 165 | 47.3  | 117.7 |
| ENSDARE00000854555 | 177 | 34.9  | 142.1 |
| ENSDARE00000854915 | 162 | 38.2  | 123.8 |
| ENSDARE00000854990 | 177 | 42.1  | 134.9 |
| ENSDARE00000855476 | 186 | 30.5  | 155.5 |
| ENSDARE00000856130 | 120 | 26.7  | 93.3  |
| ENSDARE00000856390 | 165 | 29.1  | 135.9 |
| ENSDARE00000856633 | 501 | 141.3 | 359.7 |
| ENSDARE00000856857 | 189 | 36.3  | 152.7 |
| ENSDARE00000857372 | 405 | 100.2 | 304.8 |
| ENSDARE00000858832 | 153 | 32.8  | 120.2 |
| ENSDARE00000858910 | 195 | 42.8  | 152.2 |
| ENSDARE00000858953 | 195 | 37.2  | 157.8 |
| ENSDARE00000858970 | 174 | 32.1  | 141.9 |
| ENSDARE00000858979 | 126 | 29    | 97    |
| ENSDARE00000859173 | 153 | 33.6  | 119.4 |
| ENSDARE00000859291 | 177 | 42.4  | 134.6 |
| ENSDARE00000859410 | 792 | 223.1 | 568.9 |
| ENSDARE00000859927 | 174 | 29.2  | 144.8 |
| ENSDARE00000860095 | 204 | 38.8  | 165.2 |
| ENSDARE00000860252 | 159 | 34.3  | 124.7 |
| ENSDARE00000860338 | 183 | 38.5  | 144.5 |
| ENSDARE00000860702 | 213 | 49.5  | 163.5 |
| ENSDARE00000861333 | 213 | 44.7  | 168.3 |

|                    |     |       |       |
|--------------------|-----|-------|-------|
| ENSDARE00000861379 | 165 | 36.3  | 128.7 |
| ENSDARE00000861852 | 198 | 35.1  | 162.9 |
| ENSDARE00000861925 | 141 | 32.8  | 108.2 |
| ENSDARE00000862002 | 144 | 30.3  | 113.7 |
| ENSDARE00000862055 | 153 | 37.1  | 115.9 |
| ENSDARE00000862125 | 198 | 32.5  | 165.5 |
| ENSDARE00000862658 | 330 | 66.9  | 263.1 |
| ENSDARE00000862663 | 195 | 40.8  | 154.2 |
| ENSDARE00000862912 | 207 | 50    | 157   |
| ENSDARE00000863109 | 207 | 56.5  | 150.5 |
| ENSDARE00000863323 | 171 | 36.4  | 134.6 |
| ENSDARE00000863745 | 390 | 93.6  | 296.4 |
| ENSDARE00000863766 | 726 | 189.1 | 536.9 |
| ENSDARE00000864205 | 174 | 40.6  | 133.4 |
| ENSDARE00000864404 | 153 | 38.3  | 114.7 |
| ENSDARE00000864473 | 201 | 42.6  | 158.4 |
| ENSDARE00000864664 | 156 | 40.2  | 115.8 |
| ENSDARE00000865013 | 141 | 32.7  | 108.3 |
| ENSDARE00000865311 | 129 | 33.9  | 95.1  |
| ENSDARE00000865484 | 177 | 37.8  | 139.2 |
| ENSDARE00000865566 | 192 | 39    | 153   |
| ENSDARE00000865998 | 159 | 33.3  | 125.7 |
| ENSDARE00000866016 | 126 | 27.8  | 98.2  |
| ENSDARE00000866086 | 156 | 28.8  | 127.2 |
| ENSDARE00000866149 | 159 | 40.4  | 118.6 |
| ENSDARE00000866614 | 183 | 47.3  | 135.7 |
| ENSDARE00000866755 | 165 | 36.1  | 128.9 |
| ENSDARE00000867133 | 210 | 35.1  | 174.9 |
| ENSDARE00000867912 | 264 | 47    | 217   |
| ENSDARE00000867971 | 168 | 23.1  | 144.9 |
| ENSDARE00000868720 | 156 | 40.8  | 115.2 |
| ENSDARE00000869047 | 216 | 51.5  | 164.5 |
| ENSDARE00000869051 | 138 | 22.6  | 115.4 |
| ENSDARE00000869892 | 141 | 32    | 109   |
| ENSDARE00000869900 | 162 | 43.5  | 118.5 |
| ENSDARE00000869993 | 195 | 50.5  | 144.5 |
| ENSDARE00000870665 | 180 | 40.2  | 139.8 |
| ENSDARE00000870739 | 459 | 95.6  | 363.4 |
| ENSDARE00000870882 | 171 | 37    | 134   |
| ENSDARE00000871080 | 123 | 27.6  | 95.4  |
| ENSDARE00000871192 | 186 | 44.7  | 141.3 |
| ENSDARE00000871250 | 144 | 38.2  | 105.8 |

|                    |     |       |       |
|--------------------|-----|-------|-------|
| ENSDARE00000871433 | 264 | 43.4  | 220.6 |
| ENSDARE00000871625 | 165 | 42.3  | 122.7 |
| ENSDARE00000871626 | 168 | 43.9  | 124.1 |
| ENSDARE00000871714 | 210 | 32.7  | 177.3 |
| ENSDARE00000871986 | 576 | 154.3 | 421.7 |
| ENSDARE00000872037 | 162 | 32.9  | 129.1 |
| ENSDARE00000872202 | 147 | 24    | 123   |
| ENSDARE00000873765 | 162 | 40    | 122   |
| ENSDARE00000874287 | 171 | 34.6  | 136.4 |
| ENSDARE00000874328 | 369 | 97.3  | 271.7 |
| ENSDARE00000874675 | 186 | 44    | 142   |
| ENSDARE00000874784 | 231 | 40.7  | 190.3 |
| ENSDARE00000874860 | 168 | 36.5  | 131.5 |
| ENSDARE00000875220 | 354 | 98.5  | 255.5 |
| ENSDARE00000875533 | 177 | 45    | 132   |
| ENSDARE00000875766 | 129 | 31.4  | 97.6  |
| ENSDARE00000875799 | 159 | 27.3  | 131.7 |
| ENSDARE00000876532 | 156 | 29.8  | 126.2 |
| ENSDARE00000876657 | 123 | 35.2  | 87.8  |
| ENSDARE00000877276 | 162 | 31.3  | 130.7 |
| ENSDARE00000877773 | 213 | 55.1  | 157.9 |
| ENSDARE00000878355 | 189 | 30.8  | 158.2 |
| ENSDARE00000878713 | 150 | 30.8  | 119.2 |
| ENSDARE00000879243 | 228 | 56.7  | 171.3 |
| ENSDARE00000879257 | 156 | 32    | 124   |
| ENSDARE00000879293 | 210 | 33.5  | 176.5 |
| ENSDARE00000885922 | 174 | 38.3  | 135.7 |
| ENSDARE00000886296 | 231 | 47.8  | 183.2 |
| ENSDARE00000887651 | 222 | 56.9  | 165.1 |
| ENSDARE00000887840 | 156 | 29.8  | 126.2 |
| ENSDARE00000888203 | 195 | 40.5  | 154.5 |
| ENSDARE00000888482 | 192 | 40.1  | 151.9 |
| ENSDARE00000889689 | 153 | 40.3  | 112.7 |
| ENSDARE00000890097 | 180 | 43.2  | 136.8 |
| ENSDARE00000890536 | 204 | 38.8  | 165.2 |
| ENSDARE00000890580 | 159 | 35.9  | 123.1 |
| ENSDARE00000890630 | 216 | 41.5  | 174.5 |
| ENSDARE00000891418 | 225 | 28.9  | 196.1 |
| ENSDARE00000892955 | 168 | 34.4  | 133.6 |
| ENSDARE00000893810 | 150 | 29.7  | 120.3 |
| ENSDARE00000894372 | 213 | 39.1  | 173.9 |
| ENSDARE00000894490 | 168 | 27.9  | 140.1 |

|                    |     |      |       |
|--------------------|-----|------|-------|
| ENSDARE00000894712 | 171 | 34.7 | 136.3 |
| ENSDARE00000895209 | 132 | 37.7 | 94.3  |
| ENSDARE00000895680 | 237 | 66.3 | 170.7 |
| ENSDARE00000896137 | 147 | 32   | 115   |
| ENSDARE00000896354 | 183 | 22.6 | 160.4 |
| ENSDARE00000896750 | 159 | 35.7 | 123.3 |
| ENSDARE00000896933 | 204 | 37.6 | 166.4 |
| ENSDARE00000898895 | 225 | 51.8 | 173.2 |
| ENSDARE00000898918 | 213 | 54.9 | 158.1 |
| ENSDARE00000898995 | 243 | 52.6 | 190.4 |
| ENSDARE00000899093 | 156 | 36.4 | 119.6 |
| ENSDARE00000899588 | 165 | 42   | 123   |
| ENSDARE00000899783 | 141 | 36.5 | 104.5 |
| ENSDARE00000900195 | 174 | 33.1 | 140.9 |
| ENSDARE00000900330 | 249 | 55.3 | 193.7 |
| ENSDARE00000900663 | 168 | 35.7 | 132.3 |
| ENSDARE00000900948 | 183 | 38.3 | 144.7 |
| ENSDARE00000901587 | 225 | 58.3 | 166.7 |
| ENSDARE00000902062 | 132 | 23.1 | 108.9 |
| ENSDARE00000902288 | 162 | 39.8 | 122.2 |
| ENSDARE00000902729 | 222 | 46.6 | 175.4 |
| ENSDARE00000902756 | 153 | 28.7 | 124.3 |
| ENSDARE00000903114 | 120 | 19.3 | 100.7 |
| ENSDARE00000903637 | 123 | 29   | 94    |
| ENSDARE00000903870 | 228 | 42.6 | 185.4 |
| ENSDARE00000903889 | 162 | 36.3 | 125.7 |
| ENSDARE00000904318 | 204 | 50.4 | 153.6 |
| ENSDARE00000904391 | 192 | 55.7 | 136.3 |
| ENSDARE00000904535 | 144 | 29.9 | 114.1 |
| ENSDARE00000905326 | 147 | 40.8 | 106.2 |
| ENSDARE00000905670 | 291 | 68.5 | 222.5 |
| ENSDARE00000906772 | 174 | 43   | 131   |
| ENSDARE00000907316 | 180 | 26.6 | 153.4 |
| ENSDARE00000907744 | 210 | 28.9 | 181.1 |
| ENSDARE00000908151 | 174 | 37.4 | 136.6 |
| ENSDARE00000908333 | 153 | 37   | 116   |
| ENSDARE00000908534 | 168 | 26.9 | 141.1 |
| ENSDARE00000908671 | 165 | 34.8 | 130.2 |
| ENSDARE00000908822 | 291 | 64.6 | 226.4 |
| ENSDARE00000909228 | 141 | 26.6 | 114.4 |
| ENSDARE00000909467 | 234 | 60.8 | 173.2 |
| ENSDARE00000909888 | 147 | 31.7 | 115.3 |



|                    |     |       |       |
|--------------------|-----|-------|-------|
| ENSDARE00000910087 | 228 | 46.2  | 181.8 |
| ENSDARE00000910106 | 144 | 23.4  | 120.6 |
| ENSDARE00000910233 | 177 | 36.6  | 140.4 |
| ENSDARE00000910345 | 186 | 35.5  | 150.5 |
| ENSDARE00000911821 | 180 | 40.9  | 139.1 |
| ENSDARE00000911822 | 153 | 33.5  | 119.5 |
| ENSDARE00000911979 | 150 | 29.5  | 120.5 |
| ENSDARE00000913135 | 207 | 54.4  | 152.6 |
| ENSDARE00000913273 | 141 | 29    | 112   |
| ENSDARE00000913431 | 201 | 56.3  | 144.7 |
| ENSDARE00000913727 | 171 | 49.1  | 121.9 |
| ENSDARE00000913931 | 171 | 36.8  | 134.2 |
| ENSDARE00000914404 | 237 | 57.2  | 179.8 |
| ENSDARE00000914570 | 141 | 31.4  | 109.6 |
| ENSDARE00000914613 | 150 | 21.7  | 128.3 |
| ENSDARE00000914842 | 159 | 41.6  | 117.4 |
| ENSDARE00000915604 | 192 | 35.7  | 156.3 |
| ENSDARE00000915859 | 231 | 52.5  | 178.5 |
| ENSDARE00000916402 | 153 | 33.2  | 119.8 |
| ENSDARE00000916655 | 183 | 47.4  | 135.6 |
| ENSDARE00000916846 | 156 | 29.9  | 126.1 |
| ENSDARE00000917553 | 183 | 49.2  | 133.8 |
| ENSDARE00000917741 | 123 | 23.2  | 99.8  |
| ENSDARE00000917797 | 153 | 30.1  | 122.9 |
| ENSDARE00000917924 | 267 | 59.4  | 207.6 |
| ENSDARE00000918077 | 210 | 45.9  | 164.1 |
| ENSDARE00000918202 | 165 | 44.5  | 120.5 |
| ENSDARE00000918456 | 192 | 49.6  | 142.4 |
| ENSDARE00000918805 | 153 | 40.3  | 112.7 |
| ENSDARE00000918891 | 126 | 32    | 94    |
| ENSDARE00000920084 | 198 | 40.1  | 157.9 |
| ENSDARE00000920511 | 156 | 25.7  | 130.3 |
| ENSDARE00000921298 | 156 | 36.1  | 119.9 |
| ENSDARE00000921455 | 177 | 46.8  | 130.2 |
| ENSDARE00000921553 | 198 | 37    | 161   |
| ENSDARE00000922069 | 192 | 44.5  | 147.5 |
| ENSDARE00000922088 | 186 | 32    | 154   |
| ENSDARE00000922870 | 678 | 153.3 | 524.7 |
| ENSDARE00000922979 | 162 | 23.6  | 138.4 |
| ENSDARE00000923089 | 213 | 52.1  | 160.9 |
| ENSDARE00000923574 | 186 | 47.8  | 138.2 |
| ENSDARE00000923673 | 183 | 53.6  | 129.4 |

|                    |     |      |       |
|--------------------|-----|------|-------|
| ENSDARE00000924161 | 180 | 31.9 | 148.1 |
| ENSDARE00000924510 | 237 | 47.1 | 189.9 |
| ENSDARE00000924926 | 171 | 29.6 | 141.4 |
| ENSDARE00000925418 | 174 | 36.9 | 137.1 |
| ENSDARE00000925844 | 207 | 33.5 | 173.5 |
| ENSDARE00000925931 | 150 | 41.4 | 108.6 |
| ENSDARE00000926275 | 138 | 29.6 | 108.4 |
| ENSDARE00000926491 | 408 | 94.9 | 313.1 |
| ENSDARE00000926701 | 153 | 46.5 | 106.5 |
| ENSDARE00000927706 | 246 | 58   | 188   |
| ENSDARE00000927805 | 189 | 38   | 151   |
| ENSDARE00000927911 | 189 | 31.5 | 157.5 |
| ENSDARE00000928006 | 162 | 26.5 | 135.5 |
| ENSDARE00000928698 | 156 | 32.4 | 123.6 |
| ENSDARE00000928900 | 192 | 41   | 151   |
| ENSDARE00000929152 | 183 | 40.8 | 142.2 |
| ENSDARE00000929498 | 162 | 38.5 | 123.5 |
| ENSDARE00000929960 | 174 | 42.3 | 131.7 |
| ENSDARE00000930022 | 180 | 39.2 | 140.8 |
| ENSDARE00000930089 | 210 | 46.1 | 163.9 |
| ENSDARE00000930718 | 177 | 43.6 | 133.4 |
| ENSDARE00000930829 | 162 | 44.8 | 117.2 |
| ENSDARE00000931208 | 165 | 38.8 | 126.2 |
| ENSDARE00000931608 | 129 | 30.3 | 98.7  |
| ENSDARE00000931765 | 213 | 51.9 | 161.1 |
| ENSDARE00000932691 | 192 | 32.2 | 159.8 |
| ENSDARE00000932793 | 210 | 43.4 | 166.6 |
| ENSDARE00000933176 | 195 | 43.1 | 151.9 |
| ENSDARE00000933274 | 180 | 26.2 | 153.8 |
| ENSDARE00000933693 | 150 | 42.5 | 107.5 |
| ENSDARE00000933706 | 225 | 55   | 170   |
| ENSDARE00000936053 | 165 | 34   | 131   |
| ENSDARE00000936148 | 228 | 49.9 | 178.1 |
| ENSDARE00000936574 | 225 | 48.3 | 176.7 |
| ENSDARE00000936724 | 147 | 33.1 | 113.9 |
| ENSDARE00000936760 | 264 | 48.5 | 215.5 |
| ENSDARE00000936881 | 159 | 45.6 | 113.4 |
| ENSDARE00000937011 | 186 | 42.8 | 143.2 |
| ENSDARE00000937190 | 180 | 39.8 | 140.2 |
| ENSDARE00000937296 | 498 | 87.2 | 410.8 |
| ENSDARE00000937479 | 150 | 31.9 | 118.1 |
| ENSDARE00000937643 | 189 | 48.4 | 140.6 |

|                    |     |      |       |
|--------------------|-----|------|-------|
| ENSDARE00000937708 | 192 | 49   | 143   |
| ENSDARE00000938070 | 162 | 35.9 | 126.1 |
| ENSDARE00000938436 | 162 | 39.7 | 122.3 |
| ENSDARE00000938836 | 207 | 43.9 | 163.1 |
| ENSDARE00000938892 | 231 | 45.7 | 185.3 |
| ENSDARE00000938907 | 195 | 61   | 134   |
| ENSDARE00000940014 | 156 | 33.7 | 122.3 |
| ENSDARE00000940396 | 174 | 37.6 | 136.4 |
| ENSDARE00000940413 | 177 | 25.1 | 151.9 |
| ENSDARE00000941272 | 204 | 55.4 | 148.6 |
| ENSDARE00000941898 | 159 | 32.9 | 126.1 |
| ENSDARE00000942042 | 147 | 32.4 | 114.6 |
| ENSDARE00000942567 | 183 | 33.5 | 149.5 |
| ENSDARE00000942646 | 162 | 29.2 | 132.8 |
| ENSDARE00000943340 | 144 | 32.6 | 111.4 |
| ENSDARE00000943582 | 132 | 23.8 | 108.2 |
| ENSDARE00000943995 | 213 | 47.3 | 165.7 |
| ENSDARE00000944141 | 177 | 38.5 | 138.5 |
| ENSDARE00000944152 | 174 | 38.4 | 135.6 |
| ENSDARE00000944381 | 234 | 54.2 | 179.8 |
| ENSDARE00000944430 | 147 | 34.5 | 112.5 |
| ENSDARE00000944476 | 456 | 93.7 | 362.3 |
| ENSDARE00000944614 | 156 | 28.3 | 127.7 |
| ENSDARE00000945102 | 147 | 33.2 | 113.8 |
| ENSDARE00000946025 | 162 | 38.7 | 123.3 |
| ENSDARE00000946861 | 162 | 42.9 | 119.1 |
| ENSDARE00000947692 | 171 | 38.1 | 132.9 |
| ENSDARE00000947852 | 219 | 56.1 | 162.9 |
| ENSDARE00000948339 | 153 | 34.7 | 118.3 |
| ENSDARE00000948752 | 177 | 39.3 | 137.7 |
| ENSDARE00000949063 | 132 | 33.4 | 98.6  |
| ENSDARE00000949089 | 168 | 33.9 | 134.1 |
| ENSDARE00000950013 | 120 | 31.7 | 88.3  |
| ENSDARE00000950073 | 159 | 32.1 | 126.9 |
| ENSDARE00000950368 | 171 | 31.9 | 139.1 |
| ENSDARE00000950883 | 162 | 33.3 | 128.7 |
| ENSDARE00000951279 | 165 | 24.5 | 140.5 |
| ENSDARE00000952007 | 219 | 61.8 | 157.2 |
| ENSDARE00000952025 | 183 | 46.7 | 136.3 |
| ENSDARE00000952037 | 150 | 36.8 | 113.2 |
| ENSDARE00000952051 | 147 | 29.4 | 117.6 |
| ENSDARE00000952054 | 171 | 46   | 125   |

|                    |     |      |       |
|--------------------|-----|------|-------|
| ENSDARE00000952085 | 342 | 76.3 | 265.7 |
| ENSDARE00000952289 | 120 | 26   | 94    |
| ENSDARE00000952304 | 246 | 51.9 | 194.1 |
| ENSDARE00000952441 | 177 | 28.5 | 148.5 |
| ENSDARE00000952657 | 159 | 34.9 | 124.1 |
| ENSDARE00000953313 | 150 | 27   | 123   |
| ENSDARE00000953981 | 225 | 41.4 | 183.6 |
| ENSDARE00000954210 | 240 | 38.8 | 201.2 |
| ENSDARE00000954305 | 156 | 40.3 | 115.7 |
| ENSDARE00000954362 | 366 | 57   | 309   |
| ENSDARE00000955520 | 168 | 34.8 | 133.2 |
| ENSDARE00000955823 | 186 | 27.6 | 158.4 |
| ENSDARE00000955876 | 150 | 41.7 | 108.3 |
| ENSDARE00000956594 | 192 | 42.9 | 149.1 |
| ENSDARE00000956801 | 363 | 97   | 266   |
| ENSDARE00000956846 | 174 | 34.7 | 139.3 |
| ENSDARE00000957211 | 282 | 38.2 | 243.8 |
| ENSDARE00000957300 | 168 | 34.8 | 133.2 |
| ENSDARE00000957385 | 165 | 42.4 | 122.6 |
| ENSDARE00000958591 | 141 | 34.6 | 106.4 |
| ENSDARE00000959487 | 150 | 37.1 | 112.9 |
| ENSDARE00000960098 | 150 | 38.6 | 111.4 |
| ENSDARE00000961039 | 444 | 85.6 | 358.4 |
| ENSDARE00000961180 | 159 | 37.8 | 121.2 |
| ENSDARE00000961987 | 222 | 44.3 | 177.7 |
| ENSDARE00000962853 | 183 | 50.2 | 132.8 |
| ENSDARE00000963124 | 186 | 27.6 | 158.4 |
| ENSDARE00000963225 | 177 | 47.2 | 129.8 |
| ENSDARE00000963369 | 384 | 78.8 | 305.2 |
| ENSDARE00000964380 | 261 | 64   | 197   |
| ENSDARE00000964891 | 150 | 32.6 | 117.4 |
| ENSDARE00000965053 | 156 | 28.6 | 127.4 |
| ENSDARE00000965088 | 183 | 44.9 | 138.1 |
| ENSDARE00000965346 | 201 | 35.8 | 165.2 |
| ENSDARE00000965578 | 129 | 34.3 | 94.7  |
| ENSDARE00000966090 | 222 | 30   | 192   |
| ENSDARE00000967506 | 159 | 33.9 | 125.1 |
| ENSDARE00000967963 | 156 | 45.2 | 110.8 |
| ENSDARE00000968081 | 162 | 39.4 | 122.6 |
| ENSDARE00000968248 | 162 | 36.5 | 125.5 |
| ENSDARE00000968490 | 186 | 49.2 | 136.8 |
| ENSDARE00000968805 | 246 | 55.3 | 190.7 |

|                    |     |      |       |
|--------------------|-----|------|-------|
| ENSDARE00000969266 | 237 | 58.1 | 178.9 |
| ENSDARE00000969878 | 183 | 56.9 | 126.1 |
| ENSDARE00000970000 | 174 | 37.3 | 136.7 |
| ENSDARE00000970259 | 174 | 35   | 139   |
| ENSDARE00000971065 | 129 | 29.2 | 99.8  |
| ENSDARE00000971196 | 171 | 44.3 | 126.7 |
| ENSDARE00000971525 | 144 | 32.5 | 111.5 |
| ENSDARE00000971964 | 189 | 42.6 | 146.4 |
| ENSDARE00000972047 | 498 | 129  | 369   |
| ENSDARE00000972592 | 228 | 62.1 | 165.9 |
| ENSDARE00000973010 | 177 | 30.7 | 146.3 |
| ENSDARE00000973123 | 180 | 41.7 | 138.3 |
| ENSDARE00000974248 | 150 | 32.2 | 117.8 |
| ENSDARE00000974677 | 198 | 30.9 | 167.1 |
| ENSDARE00000974859 | 153 | 32.6 | 120.4 |
| ENSDARE00000974895 | 180 | 36.1 | 143.9 |
| ENSDARE00000975067 | 231 | 40.1 | 190.9 |
| ENSDARE00000975137 | 177 | 33.3 | 143.7 |
| ENSDARE00000975486 | 147 | 29   | 118   |
| ENSDARE00000977029 | 150 | 42.7 | 107.3 |
| ENSDARE00000978211 | 165 | 33.9 | 131.1 |
| ENSDARE00000978344 | 213 | 49.5 | 163.5 |
| ENSDARE00000978552 | 237 | 33.2 | 203.8 |
| ENSDARE00000978746 | 180 | 36.1 | 143.9 |
| ENSDARE00000979167 | 189 | 40.1 | 148.9 |
| ENSDARE00000980789 | 201 | 30.9 | 170.1 |
| ENSDARE00000980893 | 150 | 29   | 121   |
| ENSDARE00000981088 | 186 | 36.8 | 149.2 |
| ENSDARE00000981217 | 159 | 34.3 | 124.7 |
| ENSDARE00000981762 | 195 | 48.1 | 146.9 |
| ENSDARE00000981851 | 258 | 40.8 | 217.2 |
| ENSDARE00000982107 | 378 | 91.8 | 286.2 |
| ENSDARE00000983648 | 183 | 37.3 | 145.7 |
| ENSDARE00000983901 | 147 | 47.4 | 99.6  |
| ENSDARE00000983921 | 243 | 51.3 | 191.7 |
| ENSDARE00000985885 | 270 | 47.1 | 222.9 |
| ENSDARE00000986356 | 180 | 32.9 | 147.1 |
| ENSDARE00000986742 | 201 | 44.9 | 156.1 |
| ENSDARE00000987684 | 192 | 38.8 | 153.2 |
| ENSDARE00000988771 | 153 | 21.1 | 131.9 |
| ENSDARE00000988844 | 156 | 32   | 124   |
| ENSDARE00000990724 | 159 | 35.2 | 123.8 |

|                    |     |       |       |
|--------------------|-----|-------|-------|
| ENSDARE00000991833 | 147 | 49.8  | 97.2  |
| ENSDARE00000991951 | 240 | 50.3  | 189.7 |
| ENSDARE00000992140 | 273 | 42.1  | 230.9 |
| ENSDARE00000992597 | 234 | 39.4  | 194.6 |
| ENSDARE00000992963 | 186 | 38.1  | 147.9 |
| ENSDARE00000995416 | 261 | 60.7  | 200.3 |
| ENSDARE00000997219 | 222 | 44    | 178   |
| ENSDARE00000997405 | 174 | 38.2  | 135.8 |
| ENSDARE00000997751 | 207 | 41.5  | 165.5 |
| ENSDARE00000997883 | 177 | 40    | 137   |
| ENSDARE00000997999 | 198 | 39.9  | 158.1 |
| ENSDARE00000998041 | 210 | 49.8  | 160.2 |
| ENSDARE00000998218 | 180 | 43.4  | 136.6 |
| ENSDARE00000998815 | 195 | 43.5  | 151.5 |
| ENSDARE00000998915 | 459 | 98.4  | 360.6 |
| ENSDARE00000999465 | 183 | 35.5  | 147.5 |
| ENSDARE00001000184 | 300 | 88.2  | 211.8 |
| ENSDARE00001004934 | 150 | 42.1  | 107.9 |
| ENSDARE00001009096 | 171 | 36.2  | 134.8 |
| ENSDARE00001011215 | 150 | 34.4  | 115.6 |
| ENSDARE00001013968 | 132 | 28.1  | 103.9 |
| ENSDARE00001015043 | 159 | 46    | 113   |
| ENSDARE00001015287 | 237 | 41.2  | 195.8 |
| ENSDARE00001015417 | 204 | 41.3  | 162.7 |
| ENSDARE00001015641 | 201 | 45    | 156   |
| ENSDARE00001017465 | 168 | 30    | 138   |
| ENSDARE00001017982 | 234 | 46.8  | 187.2 |
| ENSDARE00001018537 | 198 | 54.4  | 143.6 |
| ENSDARE00001019419 | 531 | 148.5 | 382.5 |
| ENSDARE00001020850 | 243 | 41.7  | 201.3 |
| ENSDARE00001022236 | 144 | 38    | 106   |
| ENSDARE00001023679 | 162 | 44.1  | 117.9 |
| ENSDARE00001023925 | 195 | 45.5  | 149.5 |
| ENSDARE00001024423 | 225 | 67.6  | 157.4 |
| ENSDARE00001025754 | 159 | 36.4  | 122.6 |
| ENSDARE00001027176 | 177 | 39.9  | 137.1 |
| ENSDARE00001028933 | 183 | 36.7  | 146.3 |
| ENSDARE00001030842 | 195 | 49.8  | 145.2 |
| ENSDARE00001031756 | 213 | 43    | 170   |
| ENSDARE00001032919 | 216 | 56.5  | 159.5 |
| ENSDARE00001033342 | 132 | 20.2  | 111.8 |
| ENSDARE00001034027 | 165 | 29.7  | 135.3 |

|                    |     |       |       |
|--------------------|-----|-------|-------|
| ENSDARE00001034157 | 207 | 38.1  | 168.9 |
| ENSDARE00001035096 | 207 | 47.3  | 159.7 |
| ENSDARE00001036844 | 147 | 39.3  | 107.7 |
| ENSDARE00001037880 | 168 | 37.6  | 130.4 |
| ENSDARE00001039509 | 147 | 25.1  | 121.9 |
| ENSDARE00001041332 | 147 | 36.3  | 110.7 |
| ENSDARE00001045381 | 138 | 32.8  | 105.2 |
| ENSDARE00001048933 | 300 | 69.9  | 230.1 |
| ENSDARE00001050052 | 168 | 40.4  | 127.6 |
| ENSDARE00001051767 | 162 | 38.6  | 123.4 |
| ENSDARE00001052212 | 168 | 34.6  | 133.4 |
| ENSDARE00001055477 | 150 | 30.3  | 119.7 |
| ENSDARE00001055696 | 255 | 65.4  | 189.6 |
| ENSDARE00001058263 | 162 | 32.9  | 129.1 |
| ENSDARE00001059227 | 192 | 42.8  | 149.2 |
| ENSDARE00001059482 | 132 | 26.6  | 105.4 |
| ENSDARE00001096846 | 189 | 44.3  | 144.7 |
| ENSDARE00001103899 | 162 | 47.4  | 114.6 |
| ENSDARE00001103965 | 153 | 28.1  | 124.9 |
| ENSDARE00001105279 | 165 | 37.1  | 127.9 |
| ENSDARE00001106157 | 162 | 32.1  | 129.9 |
| ENSDARE00001106579 | 165 | 26.6  | 138.4 |
| ENSDARE00001106867 | 159 | 38.2  | 120.8 |
| ENSDARE00001107617 | 150 | 46.9  | 103.1 |
| ENSDARE00001108087 | 120 | 32.9  | 87.1  |
| ENSDARE00001109237 | 216 | 49.5  | 166.5 |
| ENSDARE00001109606 | 183 | 33.1  | 149.9 |
| ENSDARE00001109668 | 207 | 29.5  | 177.5 |
| ENSDARE00001109720 | 162 | 28.3  | 133.7 |
| ENSDARE00001110191 | 294 | 57.4  | 236.6 |
| ENSDARE00001112120 | 162 | 48.1  | 113.9 |
| ENSDARE00001112216 | 183 | 35.2  | 147.8 |
| ENSDARE00001112373 | 555 | 121.8 | 433.2 |
| ENSDARE00001113159 | 180 | 27.2  | 152.8 |
| ENSDARE00001113164 | 153 | 30.2  | 122.8 |
| ENSDARE00001113432 | 177 | 39.2  | 137.8 |
| ENSDARE00001114068 | 150 | 34.1  | 115.9 |
| ENSDARE00001114072 | 135 | 33.4  | 101.6 |
| ENSDARE00001114321 | 246 | 35.1  | 210.9 |
| ENSDARE00001114558 | 180 | 36.2  | 143.8 |
| ENSDARE00001114709 | 165 | 45.3  | 119.7 |
| ENSDARE00001114771 | 162 | 41    | 121   |

|                    |     |       |       |
|--------------------|-----|-------|-------|
| ENSDARE00001115145 | 159 | 41.7  | 117.3 |
| ENSDARE00001115461 | 126 | 32    | 94    |
| ENSDARE00001115467 | 243 | 52.5  | 190.5 |
| ENSDARE00001115898 | 195 | 39.6  | 155.4 |
| ENSDARE00001115950 | 150 | 38.3  | 111.7 |
| ENSDARE00001116342 | 135 | 32.1  | 102.9 |
| ENSDARE00001116400 | 162 | 41.9  | 120.1 |
| ENSDARE00001116563 | 138 | 32.8  | 105.2 |
| ENSDARE00001117046 | 183 | 32.6  | 150.4 |
| ENSDARE00001117049 | 168 | 35.9  | 132.1 |
| ENSDARE00001117370 | 165 | 44.5  | 120.5 |
| ENSDARE00001117823 | 219 | 33.8  | 185.2 |
| ENSDARE00001117971 | 144 | 33.3  | 110.7 |
| ENSDARE00001118009 | 162 | 32    | 130   |
| ENSDARE00001118059 | 189 | 43.9  | 145.1 |
| ENSDARE00001118698 | 171 | 40.4  | 130.6 |
| ENSDARE00001119059 | 162 | 46    | 116   |
| ENSDARE00001119113 | 222 | 40.4  | 181.6 |
| ENSDARE00001120012 | 153 | 44.6  | 108.4 |
| ENSDARE00001120089 | 186 | 45.7  | 140.3 |
| ENSDARE00001120437 | 171 | 36.2  | 134.8 |
| ENSDARE00001121821 | 252 | 72.9  | 179.1 |
| ENSDARE00001121868 | 459 | 125.7 | 333.3 |
| ENSDARE00001121992 | 174 | 36.5  | 137.5 |
| ENSDARE00001122021 | 186 | 37.1  | 148.9 |
| ENSDARE00001122505 | 132 | 25.5  | 106.5 |
| ENSDARE00001123458 | 153 | 28.4  | 124.6 |
| ENSDARE00001123630 | 168 | 30.4  | 137.6 |
| ENSDARE00001124287 | 138 | 38.8  | 99.2  |
| ENSDARE00001124494 | 192 | 45.7  | 146.3 |
| ENSDARE00001124527 | 171 | 28    | 143   |
| ENSDARE00001124623 | 183 | 34    | 149   |
| ENSDARE00001125825 | 210 | 39.1  | 170.9 |
| ENSDARE00001128075 | 147 | 37.7  | 109.3 |
| ENSDARE00001128145 | 219 | 35.9  | 183.1 |
| ENSDARE00001128832 | 168 | 43.2  | 124.8 |
| ENSDARE00001129008 | 147 | 42.1  | 104.9 |
| ENSDARE00001129743 | 273 | 53.7  | 219.3 |
| ENSDARE00001129760 | 186 | 47.9  | 138.1 |
| ENSDARE00001129947 | 141 | 33.3  | 107.7 |
| ENSDARE00001130422 | 210 | 35.9  | 174.1 |
| ENSDARE00001131183 | 168 | 35.1  | 132.9 |



|                    |     |      |       |
|--------------------|-----|------|-------|
| ENSDARE00001131185 | 171 | 19.8 | 151.2 |
| ENSDARE00001131272 | 162 | 38.1 | 123.9 |
| ENSDARE00001131346 | 291 | 71.3 | 219.7 |
| ENSDARE00001132971 | 153 | 40.5 | 112.5 |
| ENSDARE00001135126 | 198 | 47.9 | 150.1 |
| ENSDARE00001136989 | 216 | 61.1 | 154.9 |
| ENSDARE00001139078 | 165 | 26.6 | 138.4 |
| ENSDARE00001140362 | 186 | 37.6 | 148.4 |
| ENSDARE00001142165 | 180 | 39.6 | 140.4 |
| ENSDARE00001142628 | 261 | 33.9 | 227.1 |
| ENSDARE00001144758 | 144 | 44.9 | 99.1  |
| ENSDARE00001146931 | 198 | 39   | 159   |
| ENSDARE00001148110 | 225 | 48.9 | 176.1 |

---

134  
135  
136  
137  
138  
139  
140  
141  
142  
143  
144  
145  
146  
147  
148  
149  
150
